## Improved cortical surface reconstruction using sub-millimeter resolution MPRAGE by image denoising

Qiyuan Tian<sup>1,2\*</sup>, Natalia Zaretskaya<sup>1,2,3,4</sup>, Qiuyun Fan<sup>1,2</sup>, Chanon Ngamsombat<sup>1,5</sup>,  
Berkin Bilgic<sup>1,2,6</sup>, Jonathan R. Polimeni<sup>1,2,6</sup>, Susie Y. Huang<sup>1,2,6</sup>

<sup>1</sup>Athinoula A. Martinos Center for Biomedical Imaging, Department of Radiology, Massachusetts General Hospital, Charlestown, MA, United States;

<sup>2</sup>Harvard Medical School, Boston, MA, United States;

<sup>3</sup>Department of Experimental Psychology and Cognitive Neuroscience, Institute of Psychology, University of Graz, Graz, Austria;

<sup>4</sup>BioTechMed-Graz, Austria;

<sup>5</sup>Department of Radiology, Faculty of Medicine, Siriraj Hospital, Mahidol University, Thailand;

<sup>6</sup>Harvard-MIT Division of Health Sciences and Technology, Massachusetts Institute of Technology, Cambridge, MA, United States;

\*Correspondence to: Qiyuan Tian, Ph.D., Athinoula A. Martinos Center for Biomedical Imaging, 149 13th Street, Charlestown, MA, 02129, United States. E-mail: [qtian@mgh.harvard.edu](mailto:qtian@mgh.harvard.edu).

## Abstract

Automatic cerebral cortical surface reconstruction is a useful tool for cortical anatomy quantification, analysis and visualization. Recently, the Human Connectome Project and several studies have shown the advantages of using  $T_1$ -weighted magnetic resonance (MR) images with sub-millimeter isotropic spatial resolution instead of the standard 1-millimeter isotropic resolution for improved accuracy of cortical surface positioning and thickness estimation. Nonetheless, sub-millimeter resolution images are noisy by nature and require averaging multiple repetitions to increase the signal-to-noise ratio for precisely delineating the cortical boundary. The prolonged acquisition time and potential motion artifacts pose significant barriers to the wide adoption of cortical surface reconstruction at sub-millimeter resolution for a broad range of neuroscientific and clinical applications. We address this challenge by evaluating the cortical surface reconstruction resulting from denoised single-repetition sub-millimeter  $T_1$ -weighted images. We systematically characterized the effects of image denoising on empirical data acquired at 0.6 mm isotropic resolution using three classical denoising methods, including denoising convolutional neural network (DnCNN), block-matching and 4-dimensional filtering (BM4D) and adaptive optimized non-local means (AONLM). The denoised single-repetition images were found to be highly similar to 6-repetition averaged images, with a low whole-brain averaged mean absolute difference of  $\sim 0.016$ , high whole-brain averaged peak signal-to-noise ratio of  $\sim 33.5$  dB and structural similarity index of 0.92, and minimal gray matter–white matter contrast loss (2% to 9%). The whole-brain mean absolute discrepancies in gray–white surface placement, gray–CSF surface placement and cortical thickness estimation were lower than 165  $\mu\text{m}$ , 155  $\mu\text{m}$  and 145  $\mu\text{m}$ —sufficiently accurate for most applications. The denoising performance is equivalent to averaging  $\sim 2.5$  repetitions of the data in terms of image similarity, and 1.6–2.2 repetitions in terms of the cortical surface placement accuracy. The scan-rescan precision of the cortical surface positioning and thickness estimation was lower than 170  $\mu\text{m}$ . Our unique dataset and systematic characterization support the use of denoising methods for improved cortical surface reconstruction sub-millimeter resolution.

**Keywords:** High-resolution, T<sub>1</sub>-weighted image, convolutional neural network, deep learning, BM4D, non-local means

## Introduction

Cerebral cortical surface reconstruction enables the delineation of the inner and outer boundaries of the highly folded human cerebral cortex from anatomical magnetic resonance imaging (MRI) data using geometric models of the cortex. The input for cortical surface reconstruction is typically a T<sub>1</sub>-weighted structural MR image volume demonstrating high gray matter–white matter and gray matter–cerebrospinal fluid (CSF) contrast. The output of cortical surface reconstruction is a pair of two-dimensional surfaces represented as polyhedral (triangular) surface meshes, which represent the gray matter–white matter interface and the gray matter–CSF interface. Accurate cortical surface reconstruction can be performed automatically using several publicly available software packages<sup>1-9</sup> and has been routinely used to quantify cortical morphology<sup>10-24</sup>, parcellate cortical areas<sup>25-27</sup>, and visualize and analyze anatomical<sup>28-32</sup>, microstructural<sup>33-36</sup> and functional<sup>37-42</sup> signals at various cortical depths and on the folded cortical manifold in a wide range of clinical and neuroscientific applications.

High-quality input T<sub>1</sub>-weighted MR images are essential for generating accurate cortical surfaces. T<sub>1</sub>-weighted MR images acquired with 1-millimeter isotropic spatial resolution have been long used for standard cortical surface reconstruction because the 1-millimeter voxels adequately sample the folded cortical ribbon in adult humans and because this acquisition provides an adequate trade-off between acquisition time, spatial resolution and signal-to-noise ratio (SNR). More recently, the Human Connectome Project (HCP) WU-Minn-Ox Consortium and several studies have shown the advantages of sub-millimeter isotropic spatial resolution for further improving the accuracy of the reconstructed cortical surfaces<sup>5,43-47</sup>. In these studies using sub-millimeter cortical surface reconstruction, the cortical surface positioning and thickness estimation in cortical regions with diminished gray–white contrast on T<sub>1</sub>-weighted MR images exhibit improved accuracy due to reduced partial volume effects on the sub-millimeter resolution images. This effect is especially noticeable in heavily myelinated cortical areas (e.g., primary motor, somatosensory, visual and auditory cortex), where the gray matter signal appears more similar in signal intensity to the white matter, as well as in insular cortex where the superficial white matter in the extreme capsule



immediately beneath the insular cortex appears darker due to partial volume effects with the claustrum<sup>43,47</sup>. In general, T<sub>1</sub>-weighted MR images with 0.8-mm isotropic resolution (half of the minimum thickness of the cortex) or higher resolution are recommended by the HCP WU-Minn-Ox Consortium<sup>46</sup>. This new standard was adopted in the healthy adult HCP<sup>44,46</sup> and the subsequent HCP Lifespan Development and Aging<sup>48-50</sup>. On the surface reconstruction side, several software packages, such as BrainVoyager<sup>51</sup>, CBS Tools<sup>5</sup> and FreeSurfer<sup>43</sup> have evolved to process anatomical MRI data at native sub-millimeter resolution.

A significant barrier to the wide adoption of the cortical surface reconstruction at sub-millimeter resolution is the longer scan time. Modern accelerated MRI techniques (e.g., compressed sensing<sup>52</sup> and Wave-CAIPI<sup>53</sup>) can encode a larger number of k-space data samples at the sub-millimeter acquisition with less noise enhancement and artifact penalties compared to conventional parallel imaging approaches. Nevertheless, sub-millimeter resolution MR images remain limited in image quality by the intrinsically low SNR of smaller voxels. Adequate image quality using such data for cortical surface reconstruction requires averaging data from at least two repetitions of the acquisition, resulting in scan times that last ~15 minutes (assuming a standard imaging acceleration factor of two) compared to ~5 minutes scan time for a routine 1-mm isotropic resolution acquisition. In fact, the number of the repetitions required to provide the same SNR scales with the square of the voxel size ratio (e.g., ~3.81 repetitions of 0.8-mm isotropic resolution data are needed to match the SNR of a single repetition of 1-mm isotropic resolution data, assuming all other parameters are held constant). Such long scans are uncomfortable and may result in increased vulnerability to motion artifacts and reduced scan throughput. Ultra-high field (e.g., 7-Tesla and 9.4-Tesla) MRI scanners and highly-parallelized phased-array radio frequency receive coil head arrays (i.e., 64 channels and above<sup>54</sup>) can significantly boost sensitivity and image SNR, but are currently still expensive and less accessible. Even at ultra-high fields, the SNR of a single repetition of sub-millimeter data may be not sufficient for accurately delineating the cortical surface in the temporal lobes because of signal dropout due to dielectric effects, and more repetitions are needed to enable high-quality whole-brain analysis.

Image denoising provides a feasible alternative strategy to obtain high-quality sub-millimeter anatomical MR images with adequate SNR from a single acquisition. Image denoising aims to recover a high-quality image from its noisy, degraded observation, which is a highly ill-posed inverse problem. Denoising algorithms often rely on prior knowledge as supplementary information to estimate high-quality images. One category of denoising methods incorporate these priors, such as sparseness<sup>52,55-58</sup> and low rank<sup>59-64</sup>, during the formation of MR images. Another category of denoising methods are designed to be applied to the reconstructed images, with numerous algorithms proposed for processing 2-dimensional images (e.g., total variation denoising<sup>65</sup>, anisotropic diffusion filtering<sup>66,67</sup>, bilateral filtering<sup>68</sup>, non-local means (NLM) filtering<sup>69</sup>, block-matching and 3-dimensional filtering (BM3D)<sup>70</sup> and K-SVD denoising<sup>71</sup>) and 3-dimensional medical imaging data<sup>72-76</sup>. As a stand-alone processing step, these methods only take in reconstructed images from the MRI scanner as inputs, without any need to intervene in the current MRI workflow, and can be directly incorporated into the existing surface reconstruction software packages.

Convolutional neural networks (CNNs) are advantageous for learning the underlying image priors and resolving the complex high-dimensional mapping from noisy images to noise-free images. Even a simple CNN for denoising (i.e., DnCNN<sup>77</sup>), comprised of stacked convolutional filters paired with rectified linear unit (ReLU) activation functions, achieves superior performance compared to the state-of-the-art BM3D denoising method. It is also relatively easy for CNNs to incorporate redundant information from other imaging modalities (e.g., using MR images to assist removal of noise in positron emission tomography (PET) images<sup>78</sup>) to boost denoising performance. Furthermore, denoising CNNs can be trained without use of noise-free target images in a self-supervised manner while still outperforming the state-of-the-art methods, which is especially useful when the noise-free target images are not available<sup>79,80</sup>. Impressively, CNN-based denoising methods can be executed extremely efficiently (in milliseconds or seconds) once trained. Thus far, CNN-based denoising has been widely applied for various biomedical imaging modalities ranging from fluorescence microscopy<sup>80,81</sup>, optical coherence tomography<sup>82</sup> to x-ray imaging<sup>83</sup>, x-ray computed tomography<sup>84</sup>, PET<sup>78,85-88</sup> and MRI<sup>84,89-95</sup>.

In the present study, we leverage multiple available denoising methods for improving cortical surface reconstruction at sub-millimeter resolution and characterize the improvement in the reconstructed surfaces offered by the different denoising approaches using empirical data. Specifically, we reconstruct cortical surfaces using single-repetition 0.6-mm isotropic resolution  $T_1$ -weighted images denoised by classical denoising methods, including BM4D<sup>75</sup>, adaptive optimized NLM (AONLM)<sup>74</sup> and DnCNN<sup>77</sup>. We systematically quantify the similarity and image contrast of denoised 0.6-mm isotropic  $T_1$ -weighted images to the corresponding high-SNR 0.6-mm isotropic images obtained by averaging 6 repetitions of the data acquired within a single scan session and compare the results to those obtained from 2- to 5-repetition averaged data. We also quantify and compare the quality and smoothness of the reconstructed surfaces as well as the similarity of cortical surface positioning and cortical thickness estimation compared to the ground truth. Finally, we characterize the scan-rescan precision of the cortical surface positioning and cortical thickness estimation derived from the sub-millimeter resolution images denoised by different methods.

## Materials and Methods

### Data acquisitions

T<sub>1</sub>-weighted images with 0.6-mm isotropic resolution of nine healthy subjects (4 for training and validation of DnCNN parameters, 5 for evaluation) were acquired on a whole-body 3-Tesla scanner (MAGNETOM Trio Tim system, Siemens Healthcare, Erlangen, Germany) using the vendor-supplied 32-channel receive coil, body transmit coil, and standard body gradients at the Athinoula A. Martinos Center for Biomedical Imaging of the Massachusetts General Hospital (MGH) with Institutional Review Board approval and written informed consent of the volunteers. The data were acquired using a 3-dimensional multi-echo magnetization-prepared rapid gradient-echo (MEMPRAGE) sequence<sup>96</sup>. A slab-selective oblique-axial acquisition using a 13 ms FOCI adiabatic inversion pulse<sup>97</sup> and acceleration factor of 2 in the partition (i.e., inner loop) direction was used to minimize the number of partition encoding steps and minimize T<sub>1</sub> blurring during the inversion recovery<sup>98-100</sup>. Because the profile of the radiofrequency pulse for the slab excitation falls off at the slab boundaries, the signal level is lower toward the superior and inferior brain yielding lower SNR locally in the acquired images (Supplementary Fig. 1a). In order to avoid spatial blurring, partial Fourier imaging was not used in any encoding direction to help preserve the 0.6-mm isotropic resolution. The sequence parameters were: repetition time = 2,510 ms, echo times = 2.88/5.6 ms, inversion time = 1,200 ms, excitation flip angle = 7°, bandwidth = 420 Hz/pixel, echo spacing = 8.4 ms, 224 axial slices with 14.3% slice oversampling, matrix size = 400×304, slice thickness = 0.6 mm, field of view = 240 mm × 182 mm, generalized autocalibrating partial parallel acquisition (GRAPPA) factor = 2, acquisition time = 10.7 minutes per run × 6 separate repetitions.

### Image processing

Image co-registration was performed six times for each subject. Each time, five image volumes were individually co-registered to the remaining one image volume (the reference image volume which was not resampled) using the robust registration method as implemented in the “*mri\_robust\_template*” function<sup>101</sup> from the FreeSurfer software<sup>1-3</sup> (version v6.0, <https://surfer.nmr.mgh.harvard.edu>), with “*satit*” and “*fixtp*”

options and “*inittp*” set to the number of the reference image volume. The reference image volume was not re-sampled to avoid changing the noise characteristics. The co-registered image volumes were gradually added to the reference image volume to create averaged image volumes with progressively increasing SNR ( $n=2, 3, 4, 5, 6$ ), which were compared to the de-noised single-repetition data in order to determine the *efficiency factor*, i.e., the number of image volumes for averaging that would be needed to obtain equivalent image and surface metric values compared to those obtained from denoised single-repetition data. Consequently, 6 pairs of image volumes, each pair consisting of a noisy image volume from the single-repetition data and a high-SNR image volume from the 6-repetition averaged data, were generated for each subject. A total of 24 pairs of image volumes (6 pairs/subject  $\times$  4 training subjects) were used as the training and validation data for optimizing the CNN parameters. For evaluation, 30 pairs of image volumes, each pair consisting of a noisy image volume from the single-repetition data (or 2- to 5-repetition averaged data) and a high-SNR image volume from 6-repetition averaged data, were used.

Spatially varying intensity bias maps were estimated using the image volumes from the single-repetition data with the unified segmentation routine<sup>7</sup> implementation in the Statistical Parametric Mapping software (SPM, <https://www.fil.ion.ucl.ac.uk/spm>) with a full-width at half-maximum (FWHM) of 30 mm and a sampling distance of 2 mm<sup>102</sup> (Supplementary Fig. 1b). The estimated bias maps were divided from images from the single-repetition and 2- to 6-repetition averaged data for correcting spatially varying intensity bias.

For improved DnCNN performance and evaluation of image and surface quality compared to those obtained from the 6-repetition averaged data, the images from the 6-repetition data were further non-linearly co-registered to the images from the single-repetition data, as well as from the 2- to 5-repetition averaged data, respectively. The non-linear co-registration slightly adjusted the image alignment locally, which accounted for the subtle non-linear shifts of tissue in the images due to factors such as subject bulk motion and the associated changes in distortion due to changing B0 inhomogeneity and gradient nonlinearity distortion during the acquisition of each repetition of data. The non-linear co-registration was performed using the

“*reg\_f3d*” function (default parameters, spline interpolation) from the NiftyReg software (<https://cmiclab.cs.ucl.ac.uk/mmodat/niftyreg>)<sup>103,104</sup>.

The local mean values of the image intensity from the co-registered 6-repetition averaged data were also slightly scaled to match those of the corresponding single repetition as well as 2- to 5-repetition averaged data to remove the residual intensity bias for improved DnCNN performance and image and surface similarity evaluation. The local mean image intensity was computed using a 3-dimensional Gaussian kernel with a standard deviation of 2 voxels (i.e., 1.2 mm).

Brain masks were created from the 6-repetition averaged image volumes by performing the FreeSurfer automatic reconstruction processing for the first five preprocessing steps (FreeSurfer’s “*recon-all*” function with the “*-autorecon1*” option). The binarized brain masks were dilated twice with holes filled using the “*fslmaths*” function from the FMRIB Software Library software<sup>105-107</sup> (FSL, <https://fsl.fmrib.ox.ac.uk>).

#### BM4D denoising

T<sub>1</sub>-weighted image volumes from the single-repetition data were denoised using the BM4D denoising algorithm<sup>70,75</sup>. BM4D extends the widely known BM3D algorithm designed for 2-dimension image data to process 3-dimensional volumetric data. The BM4D method provides superior denoising performance by grouping similar 3-dimensional blocks across the entire volume (both local and non-local) into 4-dimensional data arrays to enhance the sparsity and then performing collaborative filtering. The BM4D denoising was performed assuming Rician noise with an unknown noise standard deviation and was set to estimate the noise standard deviation and perform collaborative Wiener filtering with “modified profile” option using the publicly available MATLAB-based software (<https://www.cs.tut.fi/~foi/GCF-BM3D>).

#### AONLM denoising

$T_1$ -weighted image volumes from the single-repetition data were also denoised using the AONLM algorithm<sup>73,74</sup>. In AONLM, the restored intensities of a small block are the weighted average of the intensities of all similar blocks within a predefined neighborhood. The 3-dimensional AONLM extends the 2-dimensional NLM filtering by using a block-wise implementation with adaptive smoothing strength based on automatically estimated spatially varying image noise level. The AONLM was performed assuming Rician noise with  $3 \times 3 \times 3$  block and  $7 \times 7 \times 7$  search volume<sup>73,74</sup> using the publicly available MATLAB-based software (<https://sites.google.com/site/pierrickcoupe/software/denoising-for-medical-imaging/mri-denoising/mri-denoising-software>).

### DnCNN denoising

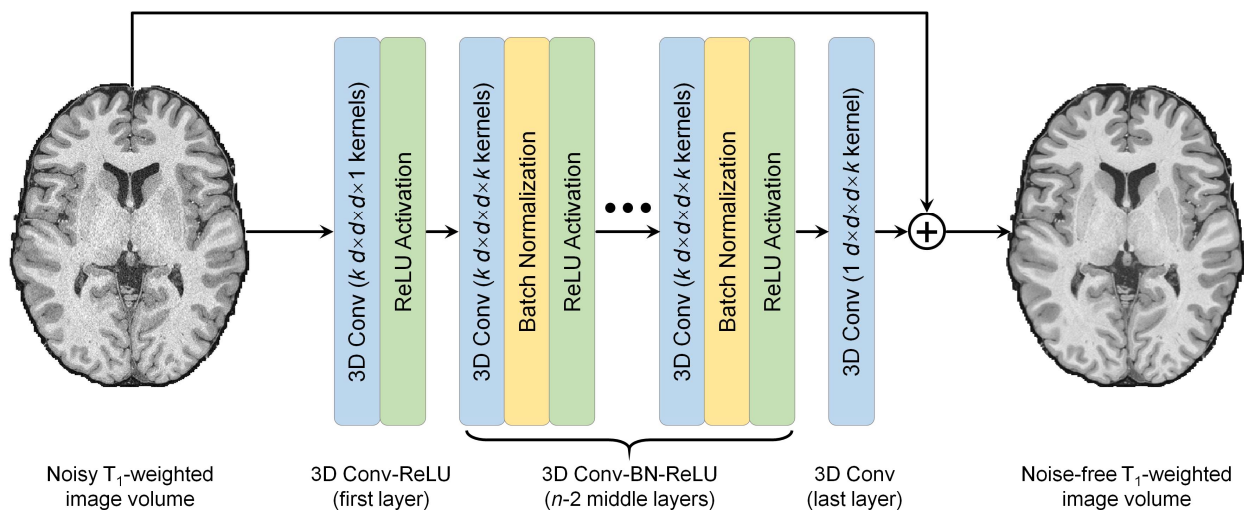

**Figure 1. Denoising convolutional neural network (DnCNN) architecture.** DnCNN is comprised of stacked 3-dimensional convolutional filters with rectified linear unit (ReLU) activation functions and batch normalization functions ( $n=20$ ,  $k=64$ ,  $d=3$ ). The input is a noisy anatomical (i.e.,  $T_1$ -weighted) image volume from one repetition of the sub-millimeter acquisition. The output is a high-signal-to-noise ratio  $T_1$ -weighted image volume obtained by averaging data from multiple repetitions of the same sub-millimeter acquisition. DnCNN maps the input image volume to the residual volume between the input and output image volume (i.e., noise).

$T_1$ -weighted image volumes from the single-repetition data were also denoised using DnCNN<sup>77</sup> (Fig. 1), a pioneering and classical CNN for denoising. The 2-dimensional convolution used for processing 2-dimensional images was extended to 3-dimensional for MRI to increase the data redundancy from an

additional spatial dimension for improved denoising performance and smooth transition between 2-dimensional image slices. DnCNN maps the input image volume to the noise, i.e., the residual volume between the input and output image volume. Residual learning facilitates the DnCNN to only learn the high-frequency information, which boosts CNN performance, accelerates convergence and avoids the vanishing gradient problem<sup>77,108,109</sup>. DnCNN has a simple network architecture comprised of stacked convolutional filters paired with rectified linear unit (ReLU) activation functions and batch normalization functions. The  $n$ -layer DnCNN consists of a first layer of paired 3D convolution ( $k$  kernels of size  $d \times d \times d \times 1$  voxels, stride of  $1 \times 1 \times 1$  voxel) and ReLU activation,  $n - 2$  middle layers of 3D convolution ( $k$  kernels of size  $d \times d \times d \times k$  voxels, stride of  $1 \times 1 \times 1$  voxel), batch normalization and ReLU activation, and a last 3D convolutional layer (one kernel of size  $d \times d \times d \times k$  voxels, stride of  $1 \times 1 \times 1$  voxel). The output layer excludes ReLU activation so that the output would include both positive and negative values. Parameter value settings of  $n=20$ ,  $k=64$ ,  $d=3$  were adopted following previous studies<sup>77</sup> (~2 million trainable parameters).

Our DnCNN network was implemented using the Keras application program interface (<https://keras.io>) with a Tensorflow backend (Google, Mountain View, California, <https://www.tensorflow.org>). Training and validation were performed on image blocks of  $81 \times 81 \times 81$  voxels (12 blocks per whole-brain volume) because of the limited GPU memory available. Sixty blocks from five random repetitions of data from each of the four training subjects (240 blocks in total) were used for training, while 12 blocks from the held-out repetition of data from each of 4 training subjects (48 blocks in total) were used for validation. The input and output image volumes were skull-stripped and image intensities were standardized by subtracting the mean intensity and then divided by the standard deviation of the image intensities of the brain voxels from the input noisy single-repetition image volumes.

All 3-dimensional convolutional kernels were randomly initialized with a “He” initialization<sup>110</sup>. Network parameters were optimized by minimizing the mean squared error within the brain (excluding the cerebellum which is irrelevant for cerebral cortical surface reconstruction and has significantly different



texture compared to the cerebrum) using stochastic gradient descent<sup>111</sup> with an Adam optimizer<sup>112</sup> (default parameters except for the learning rate) using a V100 graphics processing unit (GPU, 16G memory) (NVIDIA, Santa Clara, California) for about ~15 hours. The batch size was set to 1, the largest batch the GPU memory can accommodate. The learning rate was 0.0001 for the 20 epochs, after which the network approached convergence, and 0.00005 for another 10 epochs (~0.5 hour per epoch).

The trained DnCNN was applied to the skull-stripped and standardized whole-brain image volumes from each repetition of the 5 evaluation subjects. The predicted image intensities were transformed to the original range by multiplying with the standard deviation of the image intensities and adding the mean intensity of the brain voxels from the input noisy image volumes.

### Surface reconstruction

Cortical surface reconstruction at native 0.6-mm isotropic resolution was performed using the FreeSurfer sub-millimeter pipeline<sup>43</sup> (version v6.0) (<https://surfer.nmr.mgh.harvard.edu/fswiki/SubmillimeterRecon>). The “*recon-all*” function was executed with the “*hires*” option with an expert file that specifies 100 iterations of surface inflation in the “*mris\_inflate*” function.

### Image similarity comparison

To quantify the similarity between the image volumes from the single-repetition and 2- to 5-repetition averaged data and the denoised image volumes compared to the high-SNR image volumes from the 6-repetition averaged data, the mean absolute difference (MAD), peak SNR (PSNR) and structural similarity index (SSIM)<sup>113</sup> were computed using custom scripts written for the MATLAB software package (MathWorks, Natick, Massachusetts). PSNR, defined as  $10\log_{10}(\text{maximum possible value}^2/\text{mean squared error})$ , was computed using MATLAB’s “*psnr*” function, with larger value indicating lower mean squared error. SSIM is a perceptual metric for image similarity quantification ranging between 0 and 1 with larger value indicating higher similarity. SSIM was computed using MATLAB’s “*ssim*” function. For these

calculations, the standardized image intensities, which virtually fell into the range  $[-3, 3]$ , were normalized to the range of  $[0, 1]$  by adding 3 and dividing by 6. The group-level mean and standard deviation of the whole-brain averaged MAD, PSNR and SSIM (only within the brain mask) across 30 image volumes from the 5 evaluation subjects were computed to summarize the overall image similarity.

### Image contrast comparison

The gray–white contrast is essential for successful cortical surface reconstruction. It was therefore computed from different types of images and compared. Specifically, the gray–white contrast was computed at the location of every vertex on the gray–white surface reconstructed from the 6-repetition averaged images as  $[\text{white} - \text{gray}]/[\text{white} + \text{gray}] \cdot 100\%$ . The white matter intensity was sampled at 0.6 mm (i.e., the voxel size) below the gray–white surface. The gray matter intensity was sampled at 0.6 mm above the gray–white surface. The group-level mean and standard deviation of the whole-brain averaged vertex-wise gray–white contrast and variation of the vertex-wise gray–white contrast across 30 image volumes from the 5 evaluation subjects were computed to summarize the overall image contrast level.

### Surface quality comparison

Percentage of defective vertices and surface smoothness were used for assessing the surface quality. The percentage of defective vertices was computed as the number of vertices identified as being part of topological defects in the initial reconstructed surface prior to topology correction<sup>114</sup> (identified by FreeSurfer surface results files “*lh.defect\_labels*” and “*rh.defect\_labels*”) divided by the total number of vertices. The surface smoothness was defined as the median value of the whole-brain vertex-wise mean curvature, which was computed using FreeSurfer’s “*mriscurvature*” function. The group-level mean and standard deviation of the percentage of defective vertices, gray–white surface smoothness, gray–CSF surface smoothness across 30 image volumes from the 5 evaluation subjects were computed to summarize the overall surface quality.

### Surface accuracy comparison

The FreeSurfer longitudinal pipeline<sup>101,115,116</sup>

(<https://surfer.nmr.mgh.harvard.edu/fswiki/LongitudinalProcessing>) was used to quantify the discrepancies of the gray–white and gray–CSF surface positioning and cortical thickness estimation from the single-repetition data, 2- to 5-repetition averaged data, and denoised single-repetition data compared to those from the 6-repetition averaged data. For any two image volumes for comparison, the longitudinal pipeline provides a vertex correspondence between the cortical surfaces reconstructed for each image volume, which enables the calculation of a per-vertex vertex-wise displacement for the two bounding surfaces of the cortical gray matter as well as a per-vertex difference of the cortical thickness estimates<sup>43,117</sup>. The group-level mean and standard deviation of the mean absolute gray–white and gray–CSF surface displacement and cortical thickness difference averaged across the whole brain as well as within 34 cortical parcels (left and right hemispheres combined) from the Desikan-Killiany Atlas provided by FreeSurfer across 30 image volumes from the 5 evaluation subjects were computed to summarize the overall surface positioning accuracy.

### Surface precision comparison

The FreeSurfer longitudinal pipeline was used to quantify the discrepancies of the gray–white and gray–CSF surface positioning and cortical thickness estimation from two consecutively acquired single-repetition data (5 comparisons in total, i.e., repetition 1 vs. repetition 2, repetition 2 vs. repetition 3 to repetition 5 vs. repetition 6) denoised by DnCNN, BM4D and AONLM as described in the previous section to quantify the scan-rescan reproducibility. The group-level mean and standard deviation of the mean absolute gray–white and gray–CSF surface displacement and cortical thickness difference averaged across the whole brain as well as within 34 cortical parcels (left and right hemispheres combined) from the Desikan-Killiany Atlas provided by FreeSurfer across 25 image volumes from the 5 evaluation subjects were computed to summarize the overall surface positioning precision.

### Statistical comparison

The non-parametric Wilcoxon signed-rank test was performed for two related samples to evaluate differences between metrics of interest (i.e., the whole-brain averaged MAD, PSNR, SSIM, vertex-wise gray–white contrast, variability of the vertex-wise gray–white contrast, gray–white surface displacement, gray–CSF surface displacement and cortical thickness difference) from different types of image volume (e.g., DnCNN-denoised data vs. BM4D-denoised data, and DnCNN-denoised data vs. 6-repetition averaged data) across 30 image volumes from the 5 evaluation subjects ( $N=30$ ) for the accuracy metrics and across 25 images volume from the 5 evaluation subjects ( $N=25$ ) for the precision metrics.

## Results

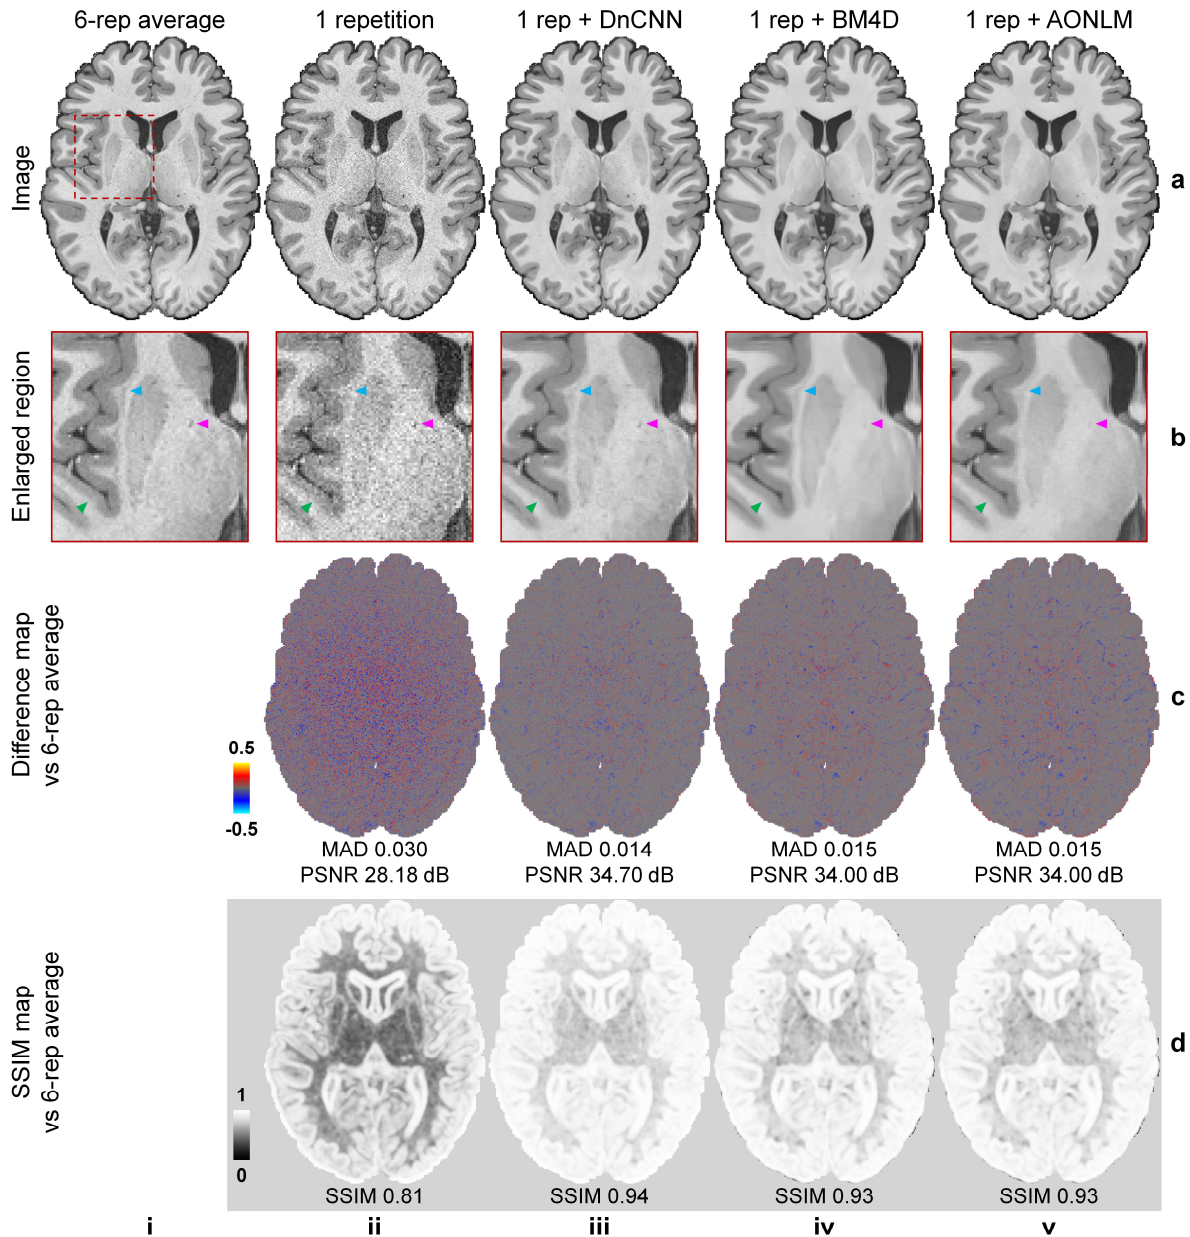

**Figure 2. Image quality and similarity.** A representative axial image slice from the 6-repetition averaged data (a, i), the single-repetition data (a, ii), and the single-repetition data denoised by DnCNN (a, iii), BM4D (a, iv) and AONLM (a, v), along with magnified views of basal ganglia (row b). The arrowheads highlight the boundary of gray matter and white matter (green), the claustrum (blue), and the blood vessel in the internal capsule (magenta). The difference maps (row c) and the structural similarity index (SSIM) maps (row d) depict the similarity between the images from the single-repetition data and the denoised data compared to the images from the 6-repetition averaged data. SSIM scores range between 0 and 1, with larger values indicating higher similarity. The whole-brain mean absolute difference (MAD), mean peak signal-to-noise ratio (PSNR) and mean SSIM are used to quantify the image similarity.

Figure 2 shows that the  $T_1$ -weighted images (Fig. 2, rows a, b, columns iii–v) denoised using DnCNN, BM4D and AONLM were better able to delineate fine anatomical structures compared to the single-repetition data (Fig. 2, rows a, b, columns ii) and were visually more comparable to the  $T_1$ -weighted image generated from the 6-repetition averaged data (Fig. 2, rows a, b, column i). The textural details were more clearly displayed with sharper gray–white and gray–CSF boundaries in the denoised images, especially in the DnCNN-denoised images, compared to those from the single-repetition data (Fig. 2, row b, arrow heads). The differences between the denoised images and 6-repetition averaged image exhibited negligible levels of anatomical structure and were substantially lower compared to those from the single-repetition images (Fig. 2, row c), with lower whole-brain averaged MAD (0.014, 0.015, 0.015 for DnCNN, BM4D and AONLM vs. 0.03) and higher PSNR (34.7 dB, 34 dB and 34 dB for DnCNN, BM4D and AONLM vs. 28.18 dB). The SSIM maps demonstrate that the denoised images were also perceptually similar to the 6-repetition averaged image (Fig. 2, row d), with higher whole-brain averaged SSIM (0.94, 0.93, 0.93 for DnCNN, BM4D and AONLM vs. 0.81). Overall, DnCNN had slightly better denoising performance than BM4D and AONLM, which generated images of very similar quality to one another.

The noise estimated by the three methods (i.e., the residual maps between the denoised images and the acquired single-repetition image) did not contain any noticeable anatomical structure or biases reflecting the underlying anatomy (Supplementary Fig. 2, rows b, columns iii–v) and were visually similar to the residual map from the 6-repetition averaged data (Supplementary Fig. 2, rows b, column ii). DnCNN estimated slightly lower noise levels in the center of the brain compared to BM4D and AONLM.

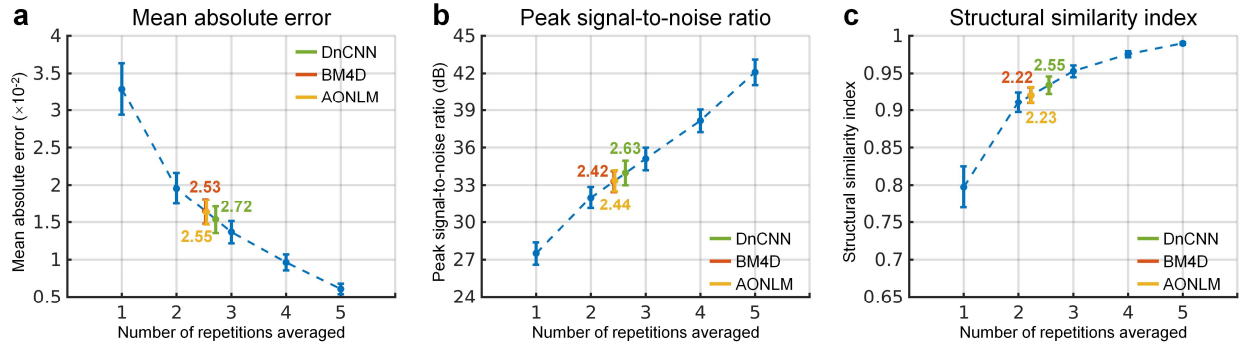

**Figure 3. Image similarity quantification.** The blue dots and error bars represent the group mean and standard deviation of the mean absolute difference (MAD) (a), peak signal-to-noise ratio (PSNR) (b) and structural similarity index (SSIM) (c) of the images from the single-repetition data and 2- to 5-repetition averaged data compared to the images from the 6-repetition averaged data across 30 image volumes from the 5 evaluation subjects. The green, red and yellow dots and error bars represent the group mean and standard deviation of the MAD, PSNR and SSIM of the images from the single-repetition data denoised by DnCNN (green), BM4D (red) and AONLM (yellow) compared to the images from the 6-repetition averaged data across 30 image volumes from the 5 evaluation subjects. The red dots and error bars for BM4D are virtually covered by the yellow dots and error bars for AONLM. The numbers above and below the dashed lines that link two neighboring blue dots indicate the number of image volumes that would be needed to obtain equivalent similarity metrics to those obtained from images from single-repetition data denoised by different methods. All comparisons of results from different denoising methods and numbers of repetitions for averaging are statistically significant ( $p < 0.05$ ).

The similarity between images from the single-repetition data and the denoised single-repetition data compared to the 6-repetition averaged data was quantified at the group level and compared to those from the 2- to 5-repetition averaged data in Figure 3. The group-level means ( $\pm$  the group-level standard deviation) of the whole-brain averaged MAD, PSNR and SSIM of the denoised images were approximately two times lower ( $0.0153 \pm 0.0018$ ,  $0.0165 \pm 0.0017$ ,  $0.0163 \pm 0.0017$  for DnCNN, BM4D and AONLM vs.  $0.0329 \pm 0.0035$ ),  $\sim 6$  dB higher ( $34.0 \pm 0.98$  dB,  $33.3 \pm 0.83$  dB,  $33.4 \pm 0.85$  dB for DnCNN, BM4D and AONLM vs.  $27.5 \pm 0.89$  dB) and approximately 0.12 higher ( $0.93 \pm 0.012$ ,  $0.92 \pm 0.011$ ,  $0.92 \pm 0.011$  for DnCNN, BM4D and AONLM vs.  $0.80 \pm 0.028$ ), respectively, compared to the single-repetition images. The image similarity levels of the denoised images compared to the 6-repetition averaged images were equivalent to those derived from what would be expected from averaging 2.5 images (2.72, 2.53, 2.55 in terms of MAD, 2.63, 2.42, 2.44 in terms of PSNR, and 2.55, 2.22, 2.23 in terms of SSIM for DnCNN, BM4D and AONLM).



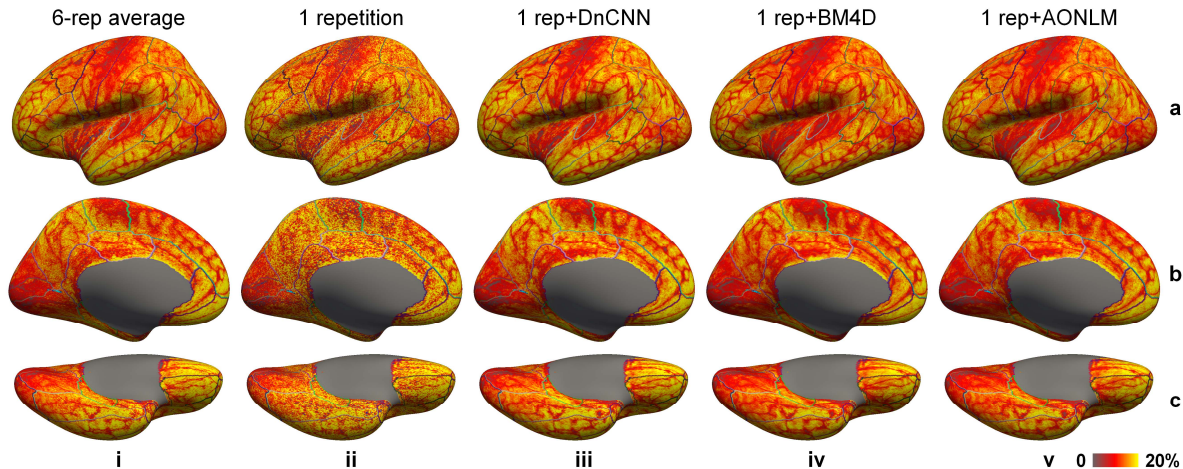

**Figure 4. Gray–white contrast.** Left-hemispheric vertex-wise contrast between the gray matter and white matter image intensity (defined as  $[\text{white} - \text{gray}]/[\text{white} + \text{gray}] \cdot 100\%$ ) from the 6-repetition averaged data (column i), single-repetition data (column ii), single-repetition data denoised by DnCNN (column iii), BM4D (column iv) and AONLM (column v) from a representative subject, displayed on inflated surface representations. Different cortical regions from the FreeSurfer cortical parcellation (i.e., *apar.c.annot*) are depicted as colored outlines

The vertex-wise gray–white contrast maps depict the spatial variation of the gray–white contrast across cortical regions (Fig. 4, averaged maps across 30 image volumes from the 5 evaluation subjects available in Supplementary Fig. 3). Overall, the gray–white contrast was consistently lower in heavily myelinated regions near the central sulcus, calcarine sulcus, paracentral gyrus, Heschl's gyrus, posterior cingulate gyrus, isthmus of the cingulate gyrus with increased gray matter image intensity on  $T_1$ -weighted images, and in the insula with decreased white matter image intensity on the  $T_1$ -weighted images arising from the partial volume effects with the claustrum<sup>47</sup>. These regions are more prone to noise during the cortical surface reconstruction process.

Gray–white contrast is critical for accurate cortical surface reconstruction, which should be preserved as much as possible during the noise removal process. The gray–white contrast map from the single-repetition data (Fig. 4, column ii) displayed similar gray–white contrast level compared to the map from the 6-repetition averaged data (Fig. 4, column i), but was more spatially variable. The gray–white contrast maps from the denoised data (Fig. 4, columns iii–v) were smoother and less spatially variable, appearing more similar to the map from the 6-repetition averaged data (Fig. 4, column i). The gray–white contrast level in



the map from DnCNN (Fig. 4, column iii) was slightly higher than those from BM4D (Fig. 4, column iv) and AONLM (Fig. 4, column v), and visibly more similar to that from the 6-repetition averaged data (Fig. 4, column i).

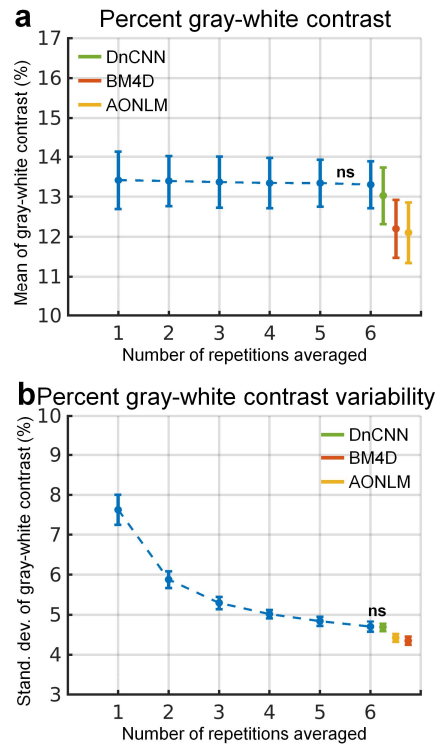

**Figure 5. Gray-white contrast quantification.** The blue dots and error bars represent the group mean and standard deviation of the spatial mean of the vertex-wise percent gray-white contrast (defined as  $[\text{white} - \text{gray}]/[\text{white} + \text{gray}] \cdot 100\%$ ) across the whole-brain cortical surface (a) and the spatial variability (calculated as standard deviation) of the vertex-wise percent gray-white contrast across the whole-brain cortical surface (b) of the images from the single-repetition data and 2- to 6-repetition averaged data across 30 image volumes from the 5 evaluation subjects. The green, red and yellow dots and error bars represent the group mean and standard deviation of the spatial mean value and spatial variability of the percent gray-white contrast of the images from the single-repetition data denoised by DnCNN (green), BM4D (red) and AONLM (yellow) across 30 image volumes from the 5 evaluation subjects. All comparisons of results from different denoising methods and numbers of repetitions for averaging are statistically significant ( $p < 0.05$ ), except for between the 5- and 6-repetition averaged data for the spatial mean value of percent gray-white contrast (a), and between the 6-repetition averaged data and the single-repetition data denoised by DnCNN for the spatial variability of the percent gray-white contrast (b) (denoted with abbreviation “ns”).

The group-level means ( $\pm$  the group-level standard deviation) of the spatial mean and spatial variability of the vertex-wise gray-white contrast across the whole brain were quantified to compare the capability of different denoising methods in preserving gray-white contrast (Fig. 5). The whole-brain averaged vertex-wise gray-white contrast stayed almost the same and decreased only marginally when averaging more

repetitions of data (Fig. 5a, blue curve), which was consistent with visual inspection (Fig. 4, columns i, ii). The whole-brain averaged vertex-wise gray–white contrast from DnCNN was slightly higher than that from BM4D and AONLM ( $13.03 \pm 0.71$  vs.  $12.20 \pm 0.73$  and  $12.10 \pm 0.76$  for BM4D and AONLM) and was only slightly lower than that from the 6-repetition averaged data ( $13.03 \pm 0.71$  vs.  $13.30 \pm 0.59$ ).

The spatial variability of the vertex-wise gray–white contrast continued to decrease when more repetitions of the data were averaged (Fig. 5b, blue curve). This finding was also visually reflected by smoother gray–white contrast maps (Fig. 4, columns i, ii). The spatial variability of the vertex-wise gray–white contrast in the DnCNN-denoised data was nearly the same as that in the 6-repetition averaged data ( $4.69 \pm 0.10$  vs.  $4.70 \pm 0.13$ , comparison not significant). The spatial variability in the BM4D- and AONLM-denoised data ( $4.35 \pm 0.10$  vs.  $4.42 \pm 0.10$ ) was further reduced than in the DnCNN-denoised data and 6-repetition averaged data, potentially due to stronger unwanted spatial smoothing effects that reduce tissue contrast.

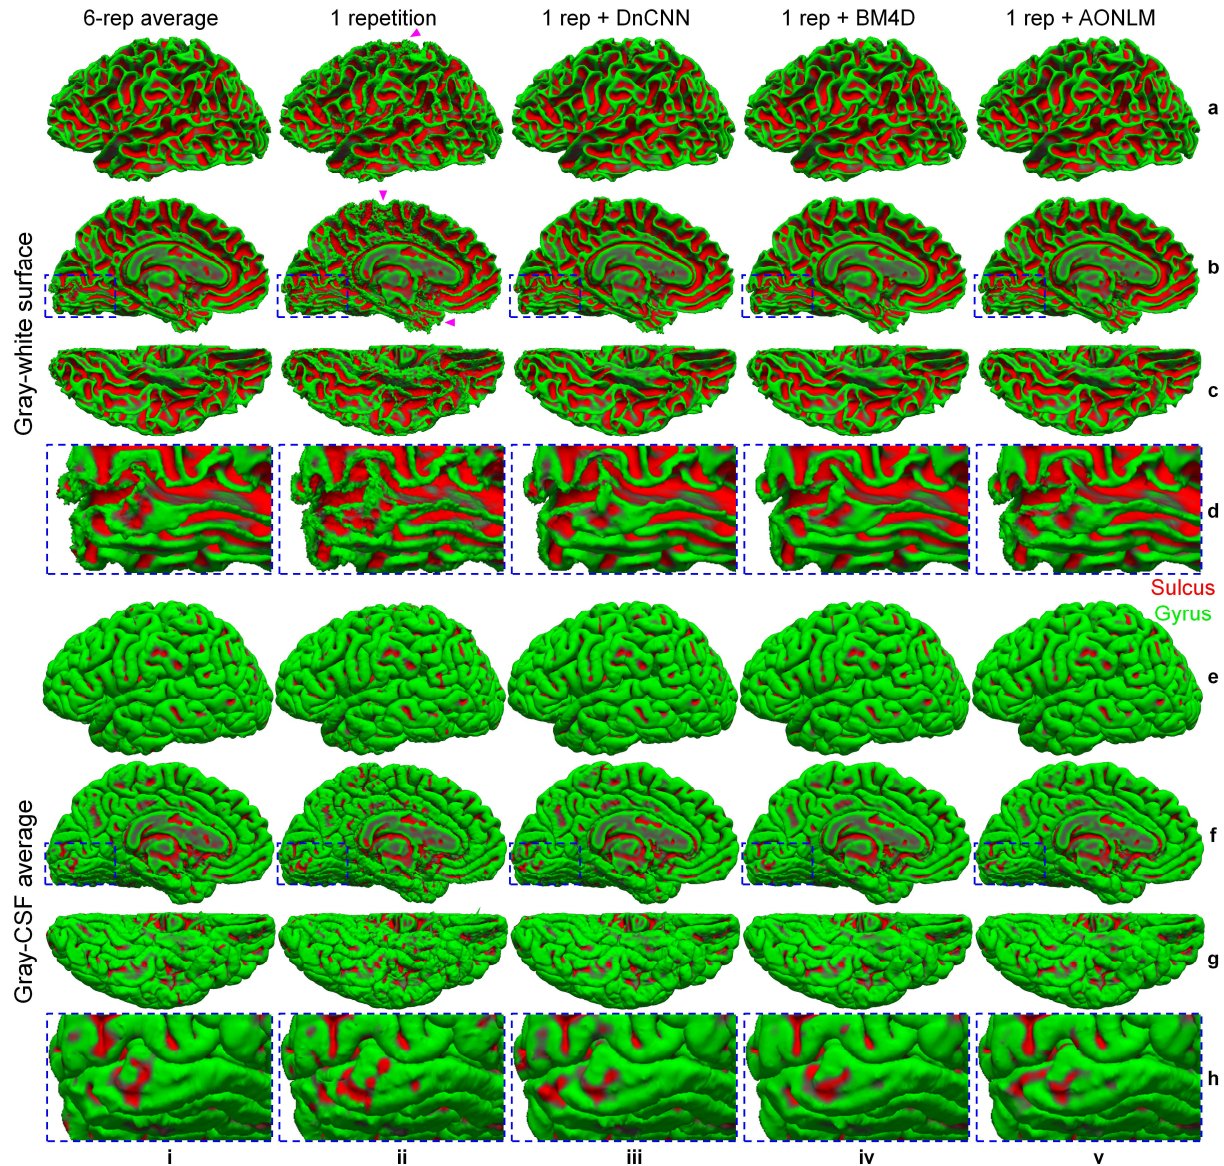

**Figure 6. Cortical interface surface.** Gray–white interface surfaces (a–d) and gray–CSF interface surfaces (e–h), along with magnified views near the Calcarine sulcus (rows d, h), reconstructed from the 6-repetition averaged data (column i), the single-repetition data (column ii), and the single-repetition data denoised by DnCNN (column iii), BM4D (column iv) and AONLM (column v) from the left hemisphere of a representative subject. The arrow heads highlight locations toward the superior and inferior brain with reduced signal-to-noise ratio in the acquired data because of the non-uniform slab excitation profile and consequently less smooth cortical surfaces.

The effects of data averaging and denoising on the reconstructed cortical surfaces are shown in Figure 6.

The cortical surfaces from the single-repetition data (Fig. 6, column ii) resembled the overall cortical geometry represented by the surfaces from the 6-repetition averaged data (Fig. 6, column i), but were not smooth. The bumpy appearance was more obviously displayed in the superior and inferior brain (Fig. 6, column ii, arrow heads), where the SNR was further reduced because of the lower signal level resulting

from the non-uniform slab excitation. The cortical surfaces from the 6-repetition averaged data and the denoised data were much smoother and more visually similar (Fig. 6, column i, iii–v). The gray–CSF surfaces were in general smoother compared to the gray–white surfaces.



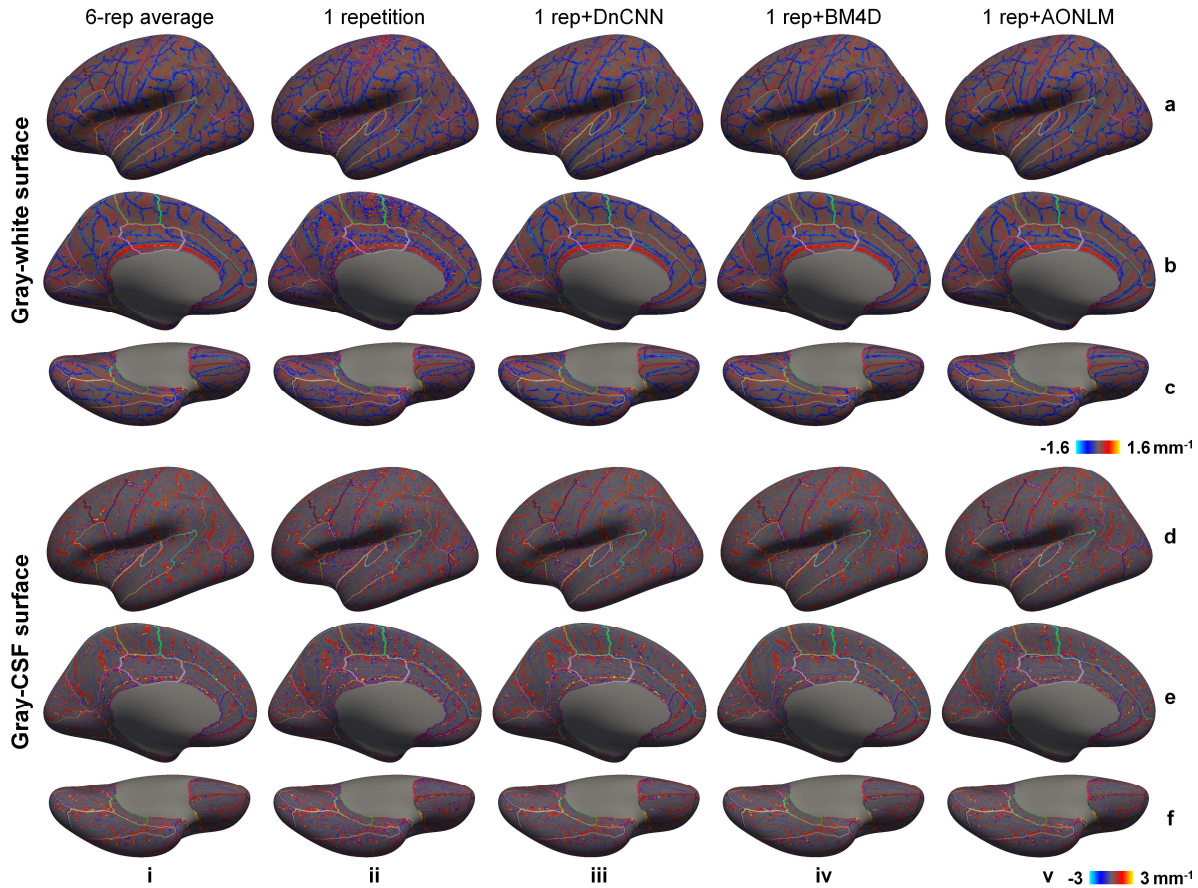

**Figure 7. Cortical surface smoothness.** Left-hemispheric vertex-wise mean curvature of the reconstructed gray–white surfaces (a–c) and gray–CSF surfaces (d–f) from the 6-repetition averaged data (column i), single-repetition data (column ii), single-repetition data denoised by DnCNN (column iii), BM4D (column iv) and AONLM (column v) from a representative subject, displayed on inflated surface representations. Different cortical regions from the FreeSurfer cortical parcellation (i.e., *aparc.annot*) are depicted as colored outlines

The mean curvature can be used to characterize the local smoothness of cortical surfaces quantitatively (Fig. 7, averaged maps across 30 image volumes from the 5 evaluation subjects available in Supplementary Fig. 4)—the mean curvature map of a smooth surface will exhibit low levels of spatial variability. For the single-repetition data, the mean curvature map of the gray–white surface was highly spatially variable near the central sulcus, calcarine sulcus, paracentral gyrus, cingulate gyrus and insula, where the gray–white contrast was lower (Fig. 4) and the image noise had a higher impact on the reconstructed cortical surfaces. The mean curvature maps from the 6-repetition averaged data and the denoised data were much less spatially variable, but were still slightly variable near the superior portion of the central sulcus because of the simultaneous reduction in gray–white contrast and lower signal levels near the edge of the excited slab.

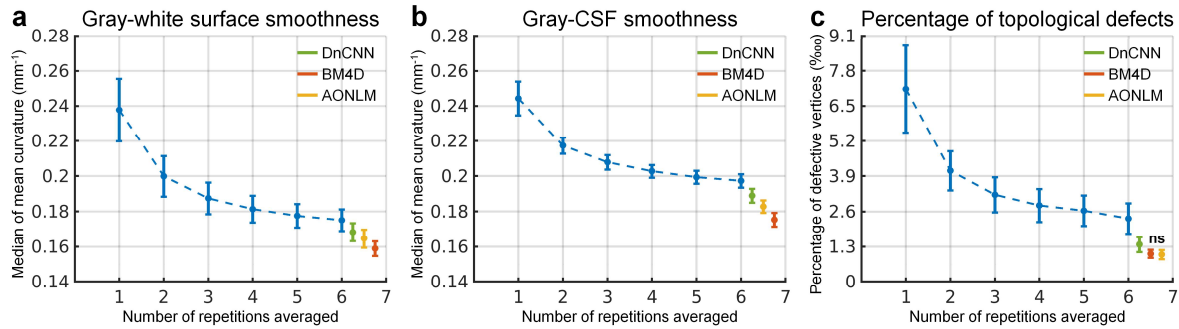

**Figure 8. Cortical surface quality quantification.** The blue dots and error bars represent the group mean and standard deviation of the smoothness of the gray–white (a) and gray–CSF surface (b) (defined as the median of the vertex-wise mean curvature across the cortical surface), and the percentage of the vertices identified as being part of topological defects in the initial surface (c) from the single-repetition data and 2- to 6-repetition averaged data across 30 image volumes from the 5 evaluation subjects. The green, red and yellow dots and error bars represent the group mean and standard deviation of the gray–white and gray–CSF surface smoothness and percentage of the defective vertices from the single-repetition data denoised by DnCnn (green), BM4D (red) and AONLM (yellow) across 30 image volumes from the 5 evaluation subjects. All comparisons of results from different denoising methods and numbers of repetitions for averaging are statistically significant ( $p < 0.05$ ), except for between the BM4D- and AONLM-denoised data for the percentage of the defective vertices (c) (denoted with abbreviation “ns”).

Quantitatively, the median of the whole-brain mean curvature decreased as the number of the averaged repetition increased (Fig. 8a, b, blue curves), indicating increased overall surface smoothness. The cortical surfaces from the denoised data were even smoother than those from the 6-repetition data ( $0.17 \pm 0.0051$ ,  $0.16 \pm 0.0042$  and  $0.16 \pm 0.0052$  for DnCnn, BM4D and AONLM vs.  $0.18 \pm 0.0061$  for 6-repetition averaged data for gray–white surface;  $0.19 \pm 0.0039$ ,  $0.18 \pm 0.0039$  and  $0.18 \pm 0.0035$  for DnCnn, BM4D and AONLM vs.  $0.20 \pm 0.0038$  for 6-repetition averaged data for gray–white surface), potentially due to stronger unwanted spatial smoothing effects. The surface smoothness from DnCnn was more similar to the surface smoothness from the 6-repetition averaged data compared to those from BM4D and AONLM. The percentage of vertices identified as being part of topological defects in the initial surfaces reconstructed from the input data prior to automatic topological correction decreased as the number of the averaged repetitions increased (Fig. 8c, blue curve), indicating improved image quality due to data averaging. The percentage of the defective vertices (typically 0.8 to 1 million vertices in total for a subject for 0.6-mm isotropic data) was even lower in the denoised data than in the 6-repetition averaged data ( $0.014\% \pm 0.0028\%$ ,  $0.01\% \pm 0.0015\%$  and  $0.01\% \pm 0.0017\%$  for DnCnn, BM4D and AONLM vs.  $0.023\% \pm 0.0056\%$  for 6-repetition averaged data).

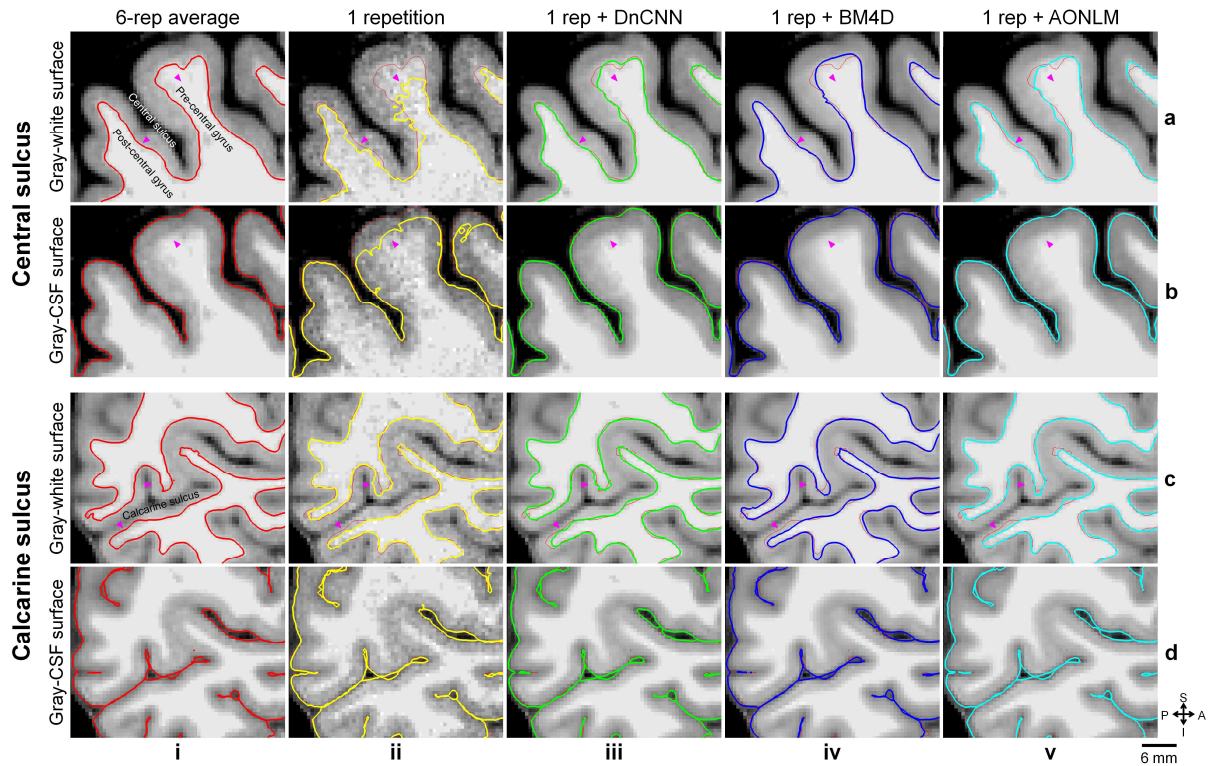

**Figure 9. Cortical surface cross-sections.** Enlarged views of sagittal image slices from the 6-repetition averaged data (column i), the single-repetition data (column ii), and the single-repetition data denoised by DnCNN (column iii), BM4D (column iv) and AONLM (column v) near the central sulcus (rows a, b) and the calcarine sulcus (rows c, d) from the left hemisphere of a representative subject. Cross-sections of the gray–white (rows a, c) and gray–CSF surfaces (rows b, d) are visualized as colored contours and overlaid on top of the images used for reconstructing the respective surfaces. The surface cross-sections from the 6-repetition averaged data are displayed as red thin contours as references along with the surface cross-sections from the single-repetition data and the denoised data (columns ii–v). The arrow heads highlight locations where denoising provides clear improvement in the cortical surface positioning estimates.

To demonstrate the effects of data averaging and denoising on the accuracy of surface positioning, cross-sections of the cortical surfaces were presented in enlarged views near the central sulcus and the calcarine sulcus (Fig. 9), chosen because they are regions with reduced gray–white contrast. The cortical surfaces reconstructed from the denoised data were similar to those reconstructed from 6-repetition averaged data and were markedly improved compared to the surface placement derived from the single-repetition data (Fig. 9, arrow heads), especially the gray–white surfaces. The discrepancy in positioning of the gray–CSF surface across the different denoising techniques was overall smaller than that of the gray–white surface.



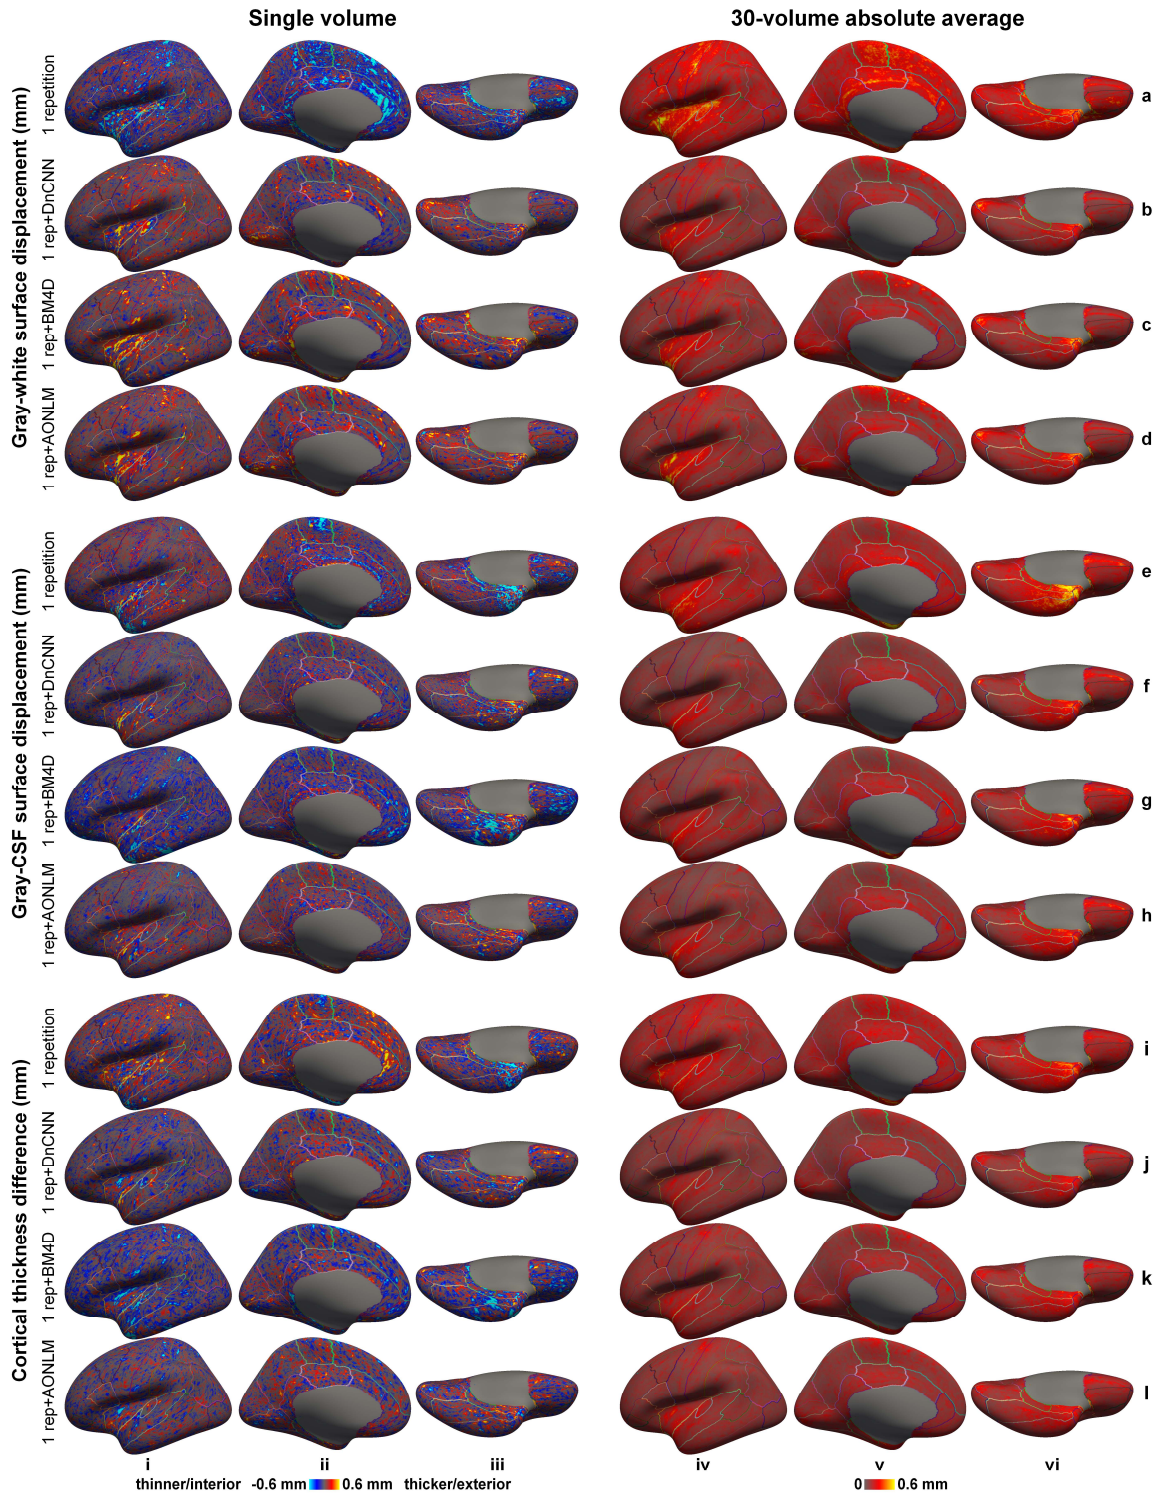

**Figure 10. Positioning and thickness accuracy.** Left-hemispheric vertex-wise displacement/difference of the gray–white surfaces (rows a–d) and gray–CSF surfaces (rows e–h) and cortical thickness estimates (rows i–l) from the single-repetition data (rows a, e, i) and the single-repetition data denoised by DnCNN (rows b, f, j), BM4D (rows c, g, k) and AONLM (rows d, h, l) compared to the surfaces estimated from the 6-repetition averaged data of a representative subject (column i–iii) and the absolute average across 30 image volumes from the 5 evaluation subjects (rows iv–vi), displayed on inflated surface representations. Different cortical regions from the FreeSurfer cortical parcellation (i.e., *aparc.annot*) are depicted as colored outlines.



The denoised images exhibited substantially lower discrepancy in the surface positioning relative to surfaces reconstructed from the 6-repetition averaged images compared to the discrepancy seen from the single-repetition images in all cortical parcels on the single-subject level (Fig. 10, columns i–iii) and group level (Fig. 10, columns iv–vi). In the denoised results, the discrepancy was most prominent near the central sulcus, calcarine sulcus, Heschl's gyrus and cingulate gyrus and insula for the gray–white surfaces (Fig. 10, rows a–d, column iv–vi), near the Heschl's gyrus and insula for the gray–CSF surfaces (Fig. 10, rows e–h, column iv–vi), and near the Heschl's gyrus and insula for the cortical thickness estimation (Fig. 10, rows i–l, column iv–vi). Estimates from the single-repetition data and denoised data near the temporal pole and orbitofrontal cortex had larger discrepancies presumably because of the large and varying geometric distortions near air-tissue interfaces in each repetition of the data, which could not be accurately aligned for averaging the 6 repetitions of the data and therefore induced increased misalignment between each single-repetition data and the 6-repetition averaged data.

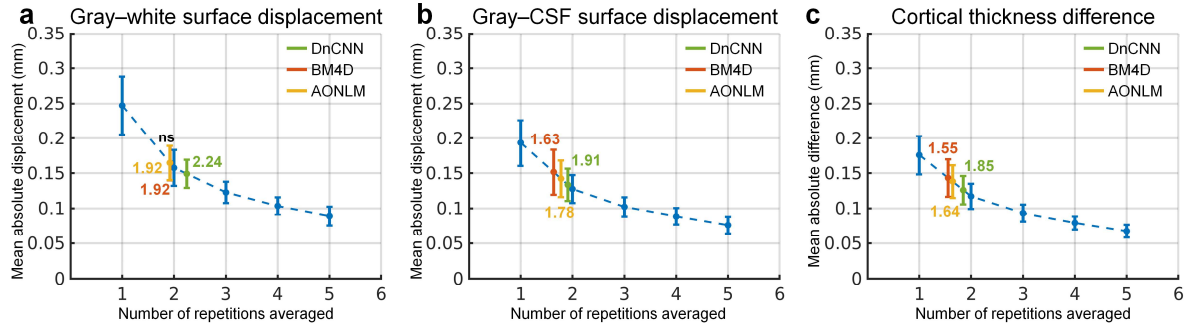

**Figure 11. Positioning and thickness accuracy quantification.** The blue dots and error bars represent the group mean and standard deviation of the whole-brain averaged absolute displacement/difference of the gray–white surface (a), gray–CSF surface (b) and cortical thickness (c) estimated from the images from the single-repetition data and 2- to 5-repetition averaged data compared to the images from the 6-repetition averaged data across 30 image volumes from the 5 evaluation subjects. The green, red and yellow dots and error bars represent the group mean and standard deviation of the whole-brain averaged absolute displacement/difference for the images from the single-repetition data denoised by DnCNN (green), BM4D (red) and AONLM (yellow) compared to the images from the 6-repetition averaged data across 30 image volumes from the 5 evaluation subjects. The red dots and error bars for BM4D are covered by the yellow dots and error bars for AONLM for the gray–white surface displacement (a). The numbers above and below the dashed lines that link two neighboring blue dots indicate the number of image volumes that would be needed to obtain equivalent similarity metrics to those obtained from images from single-repetition data denoised by different methods. All comparisons of results from different denoising methods and numbers of repetitions for averaging are statistically significant ( $p < 0.05$ ), except for between the BM4D- and AONLM-denoised data for the gray–white surface displacement (a) (denoted with abbreviation “ns”).

The group mean and standard deviation of the mean absolute displacement/difference of the gray–white surface, gray–CSF surface and cortical thickness was quantified for the whole brain (Fig. 11) and each cortical region (Supplementary Tables 1–3). The accuracy of surface positioning and cortical thickness estimation, especially the gray–white surface positioning was increased in the denoised data. The group-level means ( $\pm$  the group-level standard deviation) of the whole-brain averaged displacement of the gray–white surface in the denoised data were about two thirds of those from single-repetition images ( $0.15 \pm 0.02$  mm,  $0.16 \pm 0.025$  mm,  $0.17 \pm 0.025$  mm for DnCNN, BM4D and AONLM vs.  $0.25 \pm 0.04$  mm), which were equivalent to those derived from ~two-repetition averaged images (2.24, 1.92, 1.92 for DnCNN, BM4D and AONLM, respectively). The group-level means ( $\pm$  the group-level standard deviation) of the whole-brain averaged displacement/difference of the gray–CSF surface and cortical thickness in the denoised data were about four fifths of those from single-repetition images ( $0.13 \pm 0.023$  mm,  $0.15 \pm 0.032$  mm,  $0.14 \pm 0.026$  mm for DnCNN, BM4D and AONLM vs.  $0.19 \pm 0.033$  mm for gray–white surface positioning;  $0.13 \pm 0.02$  mm,  $0.14 \pm 0.027$  mm,  $0.14 \pm 0.023$  mm for DnCNN, BM4D and AONLM vs.

$0.18 \pm 0.027$  mm for cortical thickness estimation), which were equivalent to those derived from images by averaging 1.5 to 1.9 repetitions of data (1.91, 1.63, 1.78 for DnCNN, BM4D and AONLM for gray–white surface; 1.85, 1.55, 1.64 for DnCNN, BM4D and AONLM for cortical thickness estimation). The improvement for the gray–white surface positioning was slightly larger than for the gray–CSF surface positioning and cortical thickness estimation.

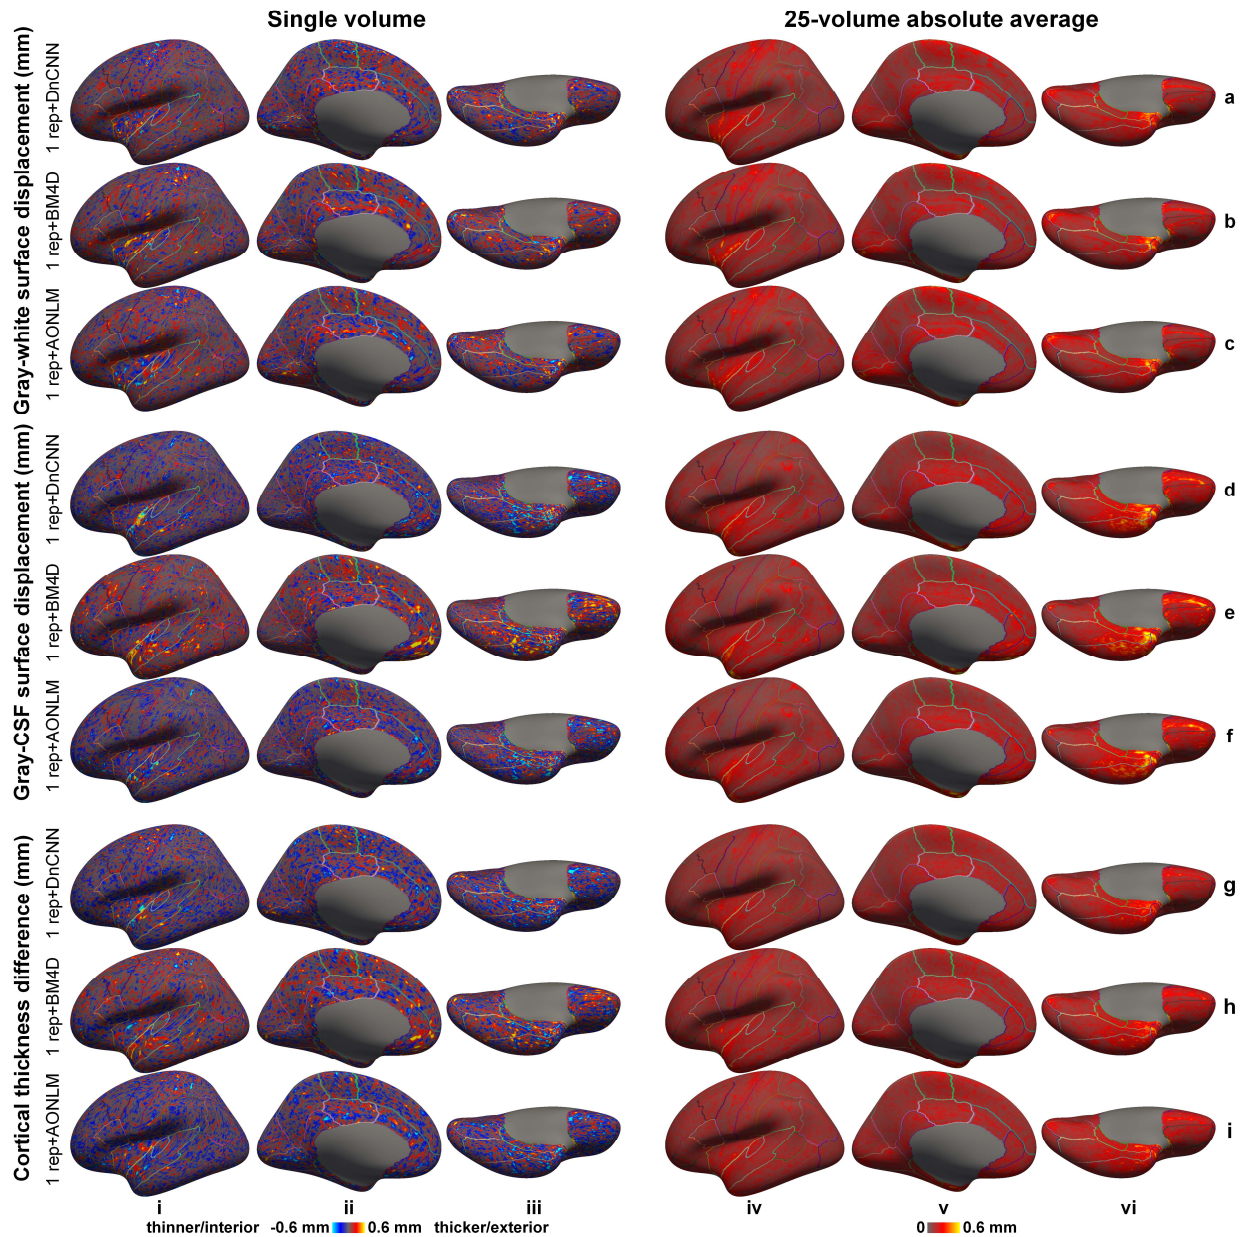

**Figure 12. Positioning and thickness precision.** Left-hemispheric vertex-wise displacement/difference of the gray–white surfaces (rows a–c) and gray–CSF surfaces (rows d–f) and cortical thickness estimates (rows g–i) from two consecutively acquired single-repetition data denoised by DnCNN (rows a, d, g), BM4D (rows b, e, h) and AONLM (rows c, f, i) of a representative subject (column i–iii) and the absolute average across 25 image volumes from the 5 evaluation subjects (rows iv–vi), displayed on inflated surface representations. Different cortical regions from the FreeSurfer cortical parcellation (i.e., *aparc.annot*) are depicted as colored outlines.

The scan-rescan precision of the cortical surface position and thickness estimation using the denoised data was quantified for the whole brain and each cortical region (Fig. 12, Supplementary Table 4). The reproducibility was in general lower near the temporal pole and orbitofrontal cortex presumably because of

the elevated image distortions in these regions. The reproducibility was lower near the central sulcus, calcarine sulcus, Heschl's gyrus and insula for the gray–white surfaces (Fig. 12, rows a–c), near the insula for the gray–CSF surfaces (Fig. 12, rows d–f) and cortical thickness estimation (Fig. 12, rows g–i), regions where accurate surface reconstruction is challenging.

The cortical surface positioning and thickness estimation derived from DnCNN-denoised results were slightly more reproducible than those from BM4D and AONLM. The group mean and standard deviation of the whole-brain averaged absolute displacement/difference between the surface reconstruction results derived from two consecutively acquired single-repetition data denoised by DnCNN, BM4D and AONLM were  $0.16 \pm 0.034$  mm,  $0.17 \pm 0.034$  mm,  $0.17 \pm 0.035$  mm for the gray–white surface,  $0.16 \pm 0.043$  mm,  $0.17 \pm 0.045$  mm,  $0.17 \pm 0.043$  mm for the gray–CSF surface, and  $0.15 \pm 0.032$  mm,  $0.16 \pm 0.034$  mm,  $0.16 \pm 0.034$  mm for the cortical thickness.

## Discussion

In this study, we demonstrate improved *in vivo* human cerebral cortical surface reconstruction at sub-millimeter isotropic resolution using denoised  $T_1$ -weighted images. We show that three well-known classical denoising methods, including DnCNN, BM4D and AONLM, effectively remove the noise in the empirical  $T_1$ -weighted data acquired at 0.6 mm isotropic resolution (~10 minutes scan) and generate high-SNR  $T_1$ -weighted images similar to those obtained by averaging 6 repetitions (~1 hour scan) of the data with only minimal loss of gray–white image intensity contrast (2% to 9%). The superior quality of the denoised images is reflected by a low whole-brain averaged MAD of ~0.016, high whole-brain averaged PSNR of ~33.5 dB and SSIM of 0.92, which is equivalent to those of  $T_1$ -weighted images obtained by averaging ~2.5 repetitions of the data, saving ~15 minutes scan time. Due to the significantly reduced noise, the reconstructed cortical surfaces are smoother with similar positioning compared to those from the 6-repetition averaged data. The whole-brain mean absolute difference in the gray–white surface placement, gray–CSF surface placement and cortical thickness estimation is lower than 160  $\mu\text{m}$ , which is equivalent to those of  $T_1$ -weighted images obtained by averaging ~1.55 to ~2.24 repetitions of the data, saving ~5 to ~12 minutes scan time, and on the same order as the test-retest precision of the FreeSurfer reconstruction (0.1 mm to 0.2 mm)<sup>117-119</sup>.

Our study systematically characterized the effects of denoising on cortical surface reconstruction using empirical data. Three well-known classical denoising methods were evaluated in our study using this characterization framework, similar to what we have applied previously to characterize anatomical image quality in terms of cortical reconstruction precision and accuracy<sup>43,47,117,119</sup>, which can be applied to evaluate other image-based and k-space-based denoising methods and more sophisticated denoising CNNs. We systematically quantified and compared not only the image similarity compared to the ground truth as in most denoising studies, but also the gray–white tissue contrast that is critical for accurate cortical surface reconstruction, surface smoothness and surface placement accuracy from the denoised data. Because our ground-truth data were obtained by data averaging (6 repetitions, ~1 hour scan), we were able to evaluate



the image and surface metrics from the denoised data relatively to those from 2- to 5-repetition averaged data and determine the *efficiency factor*, i.e., the number of image volumes for averaging that would be needed to obtain equivalent image and surface metric values compared to those obtained from denoised single-repetition images. This unique metric concisely and intuitively summarizes the denoising performance of different methods compared to data averaging, the most common practice to increase the SNR. Our results show that the denoised single-repetition data are equivalent to  $\sim 2.5$ -repetition averaged data in terms of image similarity quantified by MAD, PSNR and SSIM (Fig. 1), while being equivalent to 1.55 to 2.24-repetition averaged data in terms of cortical surface positioning and thickness estimation accuracy (Fig. 11). The discrepancy between the efficiency factors calculated using image and surface metrics suggests that the commonly used image similarity metrics alone cannot faithfully reflect the cortical surface reconstruction quality and the objective functions used during the denoising process, e.g., the mean squared error, can be further optimized for cortical surface reconstruction applications.

In addition to improving cortical surface reconstruction at sub-millimeter resolution, denoising methods can be also useful for improving cortical surface reconstruction at standard 1-mm isotropic resolution. The  $\sim 5$  minutes scan time of a standard 1-mm isotropic resolution acquisition (assuming a parallel imaging acceleration factor of two) is still considered long for elderly subjects, children and some patient populations prone to motion and/or discomfort. In order to save scan time,  $T_1$ -weighted images at resolutions lower than 1-mm isotropic (e.g., 3 to 5-mm axial slices in a 2-dimensional acquisition,  $\sim 1.5$  mm resolution along the phase-encoding direction in a 3-dimensional acquisition) are also routinely acquired in clinical practice and large-scale neuroimaging studies such as the Parkinson Progression Marker Initiative<sup>120</sup>, which preclude accurate cortical surface reconstruction and quantitative analysis of cortical morphology at 1-mm isotropic resolution. In these applications, higher parallel imaging factors (e.g., 3 or 4) can be adopted for further shortening the 1-mm isotropic acquisition duration, coupled with denoising methods for accurate cortical surface reconstruction from the noisier images. More advanced fast imaging technologies such as Wave-CAIPI<sup>53</sup> can achieve even higher acceleration factors (e.g., 9) with minimal

noise and artifact penalties and have been shown to reduce the scan time of a 1-mm isotropic acquisition to 1.15 minutes with estimated regional brain tissue volumes comparable to those from a standard 5.2 minutes scan<sup>121</sup>. Denoising methods are expected to further improve the image quality of highly accelerated 1-mm isotropic data, acquired even within a minute, for accurately delineating the cortical surface<sup>119</sup>.

The pros and cons of different denoising methods need to be weighed for different applications. The three denoising methods evaluated here, DnCNN, BM4D and AONLM, are three well-known classical denoising methods with widely accepted superior denoising performance and are often used as references against which newly developed denoising methods are compared. Our results show that CNN-based denoising method DnCNN generates denoised images and consequently reconstructed cortical surfaces that are more similar to the ground truth than BM4D and AONLM, which is achieved by effectively exploiting the data redundancy in local and non-local spatial locations as well as across numerous subjects. However, the data-driven nature of DnCNN requires additional training data (e.g., data from 4 subjects in our study) for optimizing parameters or fine-tuning the parameters of an existing DnCNN pre-trained on other datasets for improved generalization across hardware systems, pulse sequences and sequences parameters. It has been shown that results obtained by directly applying CNNs pre-trained on a different dataset are reasonably accurate but are slightly worse compared to those obtained from fine-tuned CNNs<sup>47,122,123</sup>. On the other hand, BM4D and AONLM only require a single input noisy image volume, which are more convenient in practice and especially useful when the training data for DnCNN are not available (e.g., denoising legacy data). In terms of computational efficiency, DnCNN, once trained, can be executed in milliseconds or seconds, much faster than BM4D and AONLM with run times that last anywhere from minutes to an hour depending on the computing platform. The extremely fast DnCNN could facilitate review of denoised images in near real-time on the host computer of the MRI console.

The specific DnCNN network we chose for our study is a pioneering, classic CNN for noise removal, which is characterized by its simplest (i.e., cascaded convolutional filters and nonlinear activation functions) yet



very deep (20 layers) network topology. The “plain” network architecture achieves superior performance not only in noise removal<sup>77</sup>, but also vision tasks such as object recognition<sup>124</sup> and super-resolution<sup>109,125</sup>. DnCNN has been demonstrated to outperform the state-of-the-art BM3D denoising for 2-dimension natural images, which is reproduced on empirical 3-dimension MRI data in our study in terms of both image quality and cortical surface positioning. The versatile DnCNN can be also used to perform simultaneous denoising and super-resolution (referred to as VDSR in the context of super-resolution<sup>109</sup>). This versatility is beneficial for obtaining high-quality images at a true, high sub-millimeter resolution using only product sequences and reconstruction provided by vendors, which can only encode a whole-brain volume at a high resolution nominally because of the use of partial Fourier imaging and the increased T<sub>1</sub> blurring during the inversion recovery. Simultaneous denoising and super-resolution is also helpful for obtaining images at ultra-high resolution (e.g., 0.25-mm isotropic resolution<sup>126</sup>, which requires averaging 8 repetitions from 10 hour scan on a 7-Tesla scanner) by making a balance between extremely challenging individual denoising or super-resolution and avoiding the use of prospective motion correction to acquire input noisy images at native ultra-high resolution for denoising<sup>127-131</sup>. Image super-resolution has also been shown to be an alternative way to obtain high-quality sub-millimeter resolution images for improving cortical surface reconstruction<sup>47</sup>.

## Conclusion

Our unique dataset and systematic characterization of different denoising methods support the use of denoising methods for improving cortical surface reconstruction at sub-millimeter resolution from single-repetition anatomical MR images. The denoised images from three classical denoising methods, namely DnCNN, BM4D and AONLM, are shown to be similar to 6-repetition averaged images, with high image similarity quantified by MAD, PSNR and SSIM that are equivalent to those of T<sub>1</sub>-weighted images obtained by averaging ~2.5 repetitions of the data. The discrepancies in the gray–white surface placement, gray–CSF surface placement and cortical thickness estimation are lower than 165 μm, equivalent to that of T<sub>1</sub>-weighted images obtained by averaging ~1.55 to 2.24 repetitions of the data and on the same order as the test-retest precision of FreeSurfer. The scan-rescan precision of the cortical surface positioning and thickness estimation from the denoised single-repetition data is lower than 170 μm. The proposed approach would facilitate the adoption of next-generation cortical surface reconstruction methods in a wider range of applications and neuroimaging studies that require accurate models of cortical anatomy.

## **Acknowledgments**

Thanks to Mr. Ned Ohringer for assistance in volunteer recruitment and data collection. We gratefully acknowledge the use of the Siemens “Works-In-Progress” package WIP900, which provided the inner-loop accelerated MPRAGE pulse sequence and image reconstruction. This work was supported by the National Institutes of Health (grant numbers P41-EB015896, P41-EB030006, R01-EB023281, K23-NS096056, R01-MH111419, R01-MH124004, U01-EB026996, S10-RR023401, S10-RR019307 and S10-RR023043), a Massachusetts General Hospital Claflin Distinguished Scholar Award, and the Athinoula A. Martinos Center for Biomedical Imaging. B.B. has provided consulting services to Subtle Medical.

## **Data and code availability**

The source code of the DnCNN network implemented using Keras API and the pre-trained models using the MGH 0.6-mm isotropic data will be available at <https://github.com/qiyuantian/DnSurfer>.

## References

1. Fischl B. FreeSurfer. *NeuroImage*. 2012;62(2):774-781.
2. Fischl B, Sereno MI, Dale AM. Cortical surface-based analysis: II: inflation, flattening, and a surface-based coordinate system. *NeuroImage*. 1999;9(2):195-207.
3. Dale AM, Fischl B, Sereno MI. Cortical surface-based analysis: I. Segmentation and surface reconstruction. *NeuroImage*. 1999;9(2):179-194.
4. Kim JS, Singh V, Lee JK, et al. Automated 3-D extraction and evaluation of the inner and outer cortical surfaces using a Laplacian map and partial volume effect classification. *NeuroImage*. 2005;27(1):210-221.
5. Bazin P-L, Weiss M, Dinse J, Schäfer A, Trampel R, Turner R. A computational framework for ultra-high resolution cortical segmentation at 7Tesla. *NeuroImage*. 2014;93:201-209.
6. Huntenburg JM, Steele CJ, Bazin P-L. Nighres: processing tools for high-resolution neuroimaging. *GigaScience*. 2018;7(7).
7. Ashburner J, Friston KJ. Unified segmentation. *NeuroImage*. 2005;26(3):839-851.
8. Bazin P-L, Pham DL. Homeomorphic brain image segmentation with topological and statistical atlases. *Medical image analysis*. 2008;12(5):616-625.
9. Han X, Pham DL, Tosun D, Rettmann ME, Xu C, Prince JL. CRUISE: cortical reconstruction using implicit surface evolution. *NeuroImage*. 2004;23(3):997-1012.
10. Fischl B, Dale AM. Measuring the thickness of the human cerebral cortex from magnetic resonance images. *Proceedings of the National Academy of Sciences*. 2000;97(20):11050-11055.
11. Winkler AM, Sabuncu MR, Yeo BT, et al. Measuring and comparing brain cortical surface area and other areal quantities. *NeuroImage*. 2012;61(4):1428-1443.
12. Winkler AM, Greve DN, Bjuland KJ, et al. Joint Analysis of Cortical Area and Thickness as a Replacement for the Analysis of the Volume of the Cerebral Cortex. *Cerebral Cortex*. 2017;28(2):738-749.
13. Schaer M, Cuadra MB, Tamarit L, Lazeyras F, Eliez S, Thiran J-P. A surface-based approach to quantify local cortical gyrification. *IEEE Transactions on Medical Imaging*. 2008;27(2):161-170.
14. Du A-T, Schuff N, Kramer JH, et al. Different regional patterns of cortical thinning in Alzheimer's disease and frontotemporal dementia. *Brain*. 2007;130(4):1159-1166.
15. Lerch JP, Pruessner JC, Zijdenbos A, Hampel H, Teipel SJ, Evans AC. Focal decline of cortical thickness in Alzheimer's disease identified by computational neuroanatomy. *Cerebral Cortex*. 2004;15(7):995-1001.
16. Sailer M, Fischl B, Salat D, et al. Focal thinning of the cerebral cortex in multiple sclerosis. *Brain*. 2003;126(8):1734-1744.
17. Kuperberg GR, Broome MR, McGuire PK, et al. Regionally localized thinning of the cerebral cortex in schizophrenia. *Archives of General Psychiatry*. 2003;60(9):878-888.
18. Ly M, Motzkin JC, Philippi CL, et al. Cortical thinning in psychopathy. *American Journal of Psychiatry*. 2012;169(7):743-749.
19. Wallace GL, Dankner N, Kenworthy L, Giedd JN, Martin A. Age-related temporal and parietal cortical thinning in autism spectrum disorders. *Brain*. 2010;133(12):3745-3754.
20. Schmaal L, Hibar D, Sämann P, et al. Cortical abnormalities in adults and adolescents with major depression based on brain scans from 20 cohorts worldwide in the ENIGMA Major Depressive Disorder Working Group. *Molecular Psychiatry*. 2017;22(6):900.
21. Anderson BJ, Eckburg PB, Relucio KI. Alterations in the thickness of motor cortical subregions after motor-skill learning and exercise. *Learning & Memory*. 2002;9(1):1-9.

22. Bermudez P, Lerch JP, Evans AC, Zatorre RJ. Neuroanatomical correlates of musicianship as revealed by cortical thickness and voxel-based morphometry. *Cerebral Cortex*. 2008;19(7):1583-1596.
23. Engvig A, Fjell AM, Westlye LT, et al. Effects of memory training on cortical thickness in the elderly. *NeuroImage*. 2010;52(4):1667-1676.
24. Lazar SW, Kerr CE, Wasserman RH, et al. Meditation experience is associated with increased cortical thickness. *Neuroreport*. 2005;16(17):1893.
25. Fischl B, Van Der Kouwe A, Destrieux C, et al. Automatically parcellating the human cerebral cortex. *Cerebral Cortex*. 2004;14(1):11-22.
26. Glasser MF, Coalson TS, Robinson EC, et al. A multi-modal parcellation of human cerebral cortex. *Nature*. 2016;536(7615):171-178.
27. Van Essen DC, Glasser MF, Dierker DL, Harwell J, Coalson T. Parcellations and Hemispheric Asymmetries of Human Cerebral Cortex Analyzed on Surface-Based Atlases. *Cerebral Cortex*. 2011;22(10):2241-2262.
28. Cohen-Adad J, Benner T, Greve D, et al. In vivo evidence of disseminated subpial T2\* signal changes in multiple sclerosis at 7 T: a surface-based analysis. *NeuroImage*. 2011;57(1):55-62.
29. Fracasso A, van Veluw SJ, Visser F, et al. Lines of baillarger in vivo and ex vivo: Myelin contrast across lamina at 7T MRI and histology. *NeuroImage*. 2016.
30. Marques JP, Khabipova D, Gruetter R. Studying cyto and myeloarchitecture of the human cortex at ultra-high field with quantitative imaging: R 1, R\* 2 and susceptibility. *NeuroImage*. 2016.
31. Trampel R, Ott DV, Turner R. Do the congenitally blind have a stria of Gennari? First intracortical insights in vivo. *Cerebral Cortex*. 2011;21(9):2075-2081.
32. Glasser MF, Van Essen DC. Mapping human cortical areas in vivo based on myelin content as revealed by T1-and T2-weighted MRI. *The Journal of Neuroscience*. 2011;31(32):11597-11616.
33. McNab JA, Polimeni JR, Wang R, et al. Surface based analysis of diffusion orientation for identifying architectonic domains in the in vivo human cortex. *NeuroImage*. 2013;69:87-100.
34. Kleinnijenhuis M, van Mourik T, Norris DG, Ruitter DJ, van Walsum A-MvC, Barth M. Diffusion tensor characteristics of gyrencephaly using high resolution diffusion MRI in vivo at 7T. *NeuroImage*. 2015;109:378-387.
35. Calamante F, Jeurissen B, Smith RE, Tournier JD, Connelly A. The role of whole - brain diffusion MRI as a tool for studying human in vivo cortical segregation based on a measure of neurite density. *Magnetic Resonance in Medicine*. 2017.
36. Fukutomi H, Glasser MF, Zhang H, et al. Neurite imaging reveals microstructural variations in human cerebral cortical gray matter. *NeuroImage*. 2018;182:488-499.
37. Polimeni JR, Fischl B, Greve DN, Wald LL. Laminar analysis of 7T BOLD using an imposed spatial activation pattern in human V1. *NeuroImage*. 2010;52(4):1334-1346.
38. Huber L, Goense J, Kennerley AJ, et al. Cortical lamina-dependent blood volume changes in human brain at 7 T. *NeuroImage*. 2015;107:23-33.
39. Kok P, Bains LJ, van Mourik T, Norris DG, de Lange FP. Selective activation of the deep layers of the human primary visual cortex by top-down feedback. *Current Biology*. 2016;26(3):371-376.
40. Maass A, Schütze H, Speck O, et al. Laminar activity in the hippocampus and entorhinal cortex related to novelty and episodic encoding. *Nature Communications*. 2014;5:5547.
41. Nasr S, Polimeni JR, Tootell RB. Interdigitated color-and disparity-selective columns within human visual cortical areas V2 and V3. *Journal of Neuroscience*. 2016;36(6):1841-1857.

42. Olman CA, Harel N, Feinberg DA, et al. Layer-specific fMRI reflects different neuronal computations at different depths in human V1. *PLoS One*. 2012;7(3):e32536.
43. Zaretskaya N, Fischl B, Reuter M, Renvall V, Polimeni JR. Advantages of cortical surface reconstruction using submillimeter 7 T MEMPRAGE. *NeuroImage*. 2018;165:11-26.
44. Glasser MF, Sotiropoulos SN, Wilson JA, et al. The minimal preprocessing pipelines for the Human Connectome Project. *NeuroImage*. 2013;80:105-124.
45. Lüsebrink F, Wollrab A, Speck O. Cortical thickness determination of the human brain using high resolution 3 T and 7 T MRI data. *NeuroImage*. 2013;70:122-131.
46. Glasser MF, Smith SM, Marcus DS, et al. The human connectome project's neuroimaging approach. *Nature Neuroscience*. 2016;19(9):1175-1187.
47. Tian Q, Bilgic B, Fan Q, et al. Improving in vivo human cerebral cortical surface reconstruction using data-driven super-resolution. *Cerebral Cortex*. 2020.
48. Bookheimer SY, Salat DH, Terpstra M, et al. The Lifespan Human Connectome Project in Aging: An overview. *NeuroImage*. 2019;185:335-348.
49. Somerville LH, Bookheimer SY, Buckner RL, et al. The Lifespan Human Connectome Project in Development: A large-scale study of brain connectivity development in 5–21 year olds. *NeuroImage*. 2018;183:456-468.
50. Harms MP, Somerville LH, Ances BM, et al. Extending the Human Connectome Project across ages: Imaging protocols for the Lifespan Development and Aging projects. *NeuroImage*. 2018;183:972-984.
51. Goebel R. BrainVoyager—past, present, future. *NeuroImage*. 2012;62(2):748-756.
52. Lustig M, Donoho D, Pauly JM. Sparse MRI: The application of compressed sensing for rapid MR imaging. *Magnetic Resonance in Medicine: An Official Journal of the International Society for Magnetic Resonance in Medicine*. 2007;58(6):1182-1195.
53. Bilgic B, Gagoski BA, Cauley SF, et al. Wave - CAIPI for highly accelerated 3D imaging. *Magnetic resonance in medicine*. 2015;73(6):2152-2162.
54. Keil B, Blau JN, Biber S, et al. A 64-channel 3T array coil for accelerated brain MRI. *Magnetic Resonance in Medicine*. 2013;70(1):248-258.
55. Block KT, Uecker M, Frahm J. Undersampled radial MRI with multiple coils. Iterative image reconstruction using a total variation constraint. *Magnetic Resonance in Medicine: An Official Journal of the International Society for Magnetic Resonance in Medicine*. 2007;57(6):1086-1098.
56. Liang D, Liu B, Wang J, Ying L. Accelerating SENSE using compressed sensing. *Magnetic Resonance in Medicine: An Official Journal of the International Society for Magnetic Resonance in Medicine*. 2009;62(6):1574-1584.
57. Murphy M, Alley M, Demmel J, Keutzer K, Vasanawala S, Lustig M. Fast  $\ell_1$  -SPIRiT Compressed Sensing Parallel Imaging MRI: Scalable Parallel Implementation and Clinically Feasible Runtime. *IEEE transactions on medical imaging*. 2012;31(6):1250-1262.
58. Otazo R, Kim D, Axel L, Sodickson DK. Combination of compressed sensing and parallel imaging for highly accelerated first - pass cardiac perfusion MRI. *Magnetic resonance in medicine*. 2010;64(3):767-776.
59. Hu Y, Levine EG, Tian Q, et al. Motion - robust reconstruction of multishot diffusion - weighted images without phase estimation through locally low - rank regularization. *Magnetic resonance in medicine*. 2019;81(2):1181-1190.
60. Hu Y, Wang X, Tian Q, et al. Multi-shot diffusion-weighted MRI reconstruction with magnitude-based spatial-angular locally low-rank regularization (SPA-LLR). *Magnetic Resonance in Medicine*. 2020;83(5):1596-1607.



61. Kim TH, Bilgic B, Polak D, Setsompop K, Haldar JP. Wave - LORAKS: Combining wave encoding with structured low - rank matrix modeling for more highly accelerated 3D imaging. *Magnetic resonance in medicine*. 2019;81(3):1620-1633.
62. Haldar JP. Low-rank modeling of local  $k$ -space neighborhoods (LORAKS) for constrained MRI. *IEEE transactions on medical imaging*. 2013;33(3):668-681.
63. Shin PJ, Larson PE, Ohliger MA, et al. Calibrationless parallel imaging reconstruction based on structured low - rank matrix completion. *Magnetic resonance in medicine*. 2014;72(4):959-970.
64. Haldar JP, Zhuo J. P - LORAKS: low - rank modeling of local  $k$  - space neighborhoods with parallel imaging data. *Magnetic resonance in medicine*. 2016;75(4):1499-1514.
65. Rudin LI, Osher S, Fatemi E. Nonlinear total variation based noise removal algorithms. *Physica D: nonlinear phenomena*. 1992;60(1-4):259-268.
66. Perona P, Malik J. Scale-space and edge detection using anisotropic diffusion. *IEEE Transactions on pattern analysis and machine intelligence*. 1990;12(7):629-639.
67. Fischl B, Schwartz EL. Learning an integral equation approximation to nonlinear anisotropic diffusion in image processing. *IEEE Transactions on Pattern Analysis and Machine Intelligence*. 1997;19(4):342-352.
68. Tomasi C, Manduchi R. Bilateral filtering for gray and color images. Paper presented at: Sixth international conference on computer vision (IEEE Cat. No. 98CH36271)1998.
69. Buades A, Coll B, Morel J-M. A review of image denoising algorithms, with a new one. *Multiscale Modeling & Simulation*. 2005;4(2):490-530.
70. Dabov K, Foi A, Katkovnik V, Egiazarian K. Image denoising by sparse 3-D transform-domain collaborative filtering. *IEEE Transactions on image processing*. 2007;16(8):2080-2095.
71. Aharon M, Elad M, Bruckstein A. K-SVD: An algorithm for designing overcomplete dictionaries for sparse representation. *IEEE Transactions on signal processing*. 2006;54(11):4311-4322.
72. Gerig G, Kubler O, Kikinis R, Jolesz FA. Nonlinear anisotropic filtering of MRI data. *IEEE Transactions on medical imaging*. 1992;11(2):221-232.
73. Coupé P, Yger P, Prima S, Hellier P, Kervrann C, Barillot C. An optimized blockwise nonlocal means denoising filter for 3-D magnetic resonance images. *IEEE transactions on medical imaging*. 2008;27(4):425-441.
74. Manjón JV, Coupé P, Martí - Bonmatí L, Collins DL, Robles M. Adaptive non - local means denoising of MR images with spatially varying noise levels. *Journal of Magnetic Resonance Imaging*. 2010;31(1):192-203.
75. Maggioni M, Katkovnik V, Egiazarian K, Foi A. Nonlocal transform-domain filter for volumetric data denoising and reconstruction. *IEEE transactions on image processing*. 2012;22(1):119-133.
76. Bazin P-L, Alkemade A, Van Der Zwaag W, Caan M, Mulder M, Forstmann BU. Denoising High-field Multi-dimensional MRI with Local Complex PCA. *Frontiers in neuroscience*. 2019;13:1066.
77. Zhang K, Zuo W, Chen Y, Meng D, Zhang L. Beyond a gaussian denoiser: Residual learning of deep cnn for image denoising. *IEEE Transactions on Image Processing*. 2017;26(7):3142-3155.
78. Chen KT, Gong E, de Carvalho Macruz FB, et al. Ultra-Low-Dose 18F-Florbetaben Amyloid PET Imaging Using Deep Learning with Multi-Contrast MRI Inputs. *Radiology*. 2018.
79. Lehtinen J, Munkberg J, Hasselgren J, et al. Noise2Noise: Learning Image Restoration without Clean Data. Proceedings of the 35th International Conference on Machine Learning; 2018; Proceedings of Machine Learning Research.

80. Krull A, Buchholz T-O, Jug F. Noise2void-learning denoising from single noisy images. Paper presented at: Proceedings of the IEEE Conference on Computer Vision and Pattern Recognition2019.
81. Weigert M, Schmidt U, Boothe T, et al. Content-aware image restoration: pushing the limits of fluorescence microscopy. *Nature methods*. 2018;15(12):1090-1097.
82. Devalla SK, Subramanian G, Pham TH, et al. A deep learning approach to denoise optical coherence tomography images of the optic nerve head. *Scientific reports*. 2019;9(1):1-13.
83. Gondara L. Medical image denoising using convolutional denoising autoencoders. Paper presented at: 2016 IEEE 16th International Conference on Data Mining Workshops (ICDMW)2016.
84. Chang Y, Yan L, Chen M, Fang H, Zhong S. Two-stage convolutional neural network for medical noise removal via image decomposition. *IEEE Transactions on Instrumentation and Measurement*. 2019;69(6):2707-2721.
85. Ouyang J, Chen KT, Gong E, Pauly J, Zaharchuk G. Ultra - low - dose PET reconstruction using generative adversarial network with feature matching and task - specific perceptual loss. *Medical physics*. 2019;46(8):3555-3564.
86. Wang Y, Yu B, Wang L, et al. 3D conditional generative adversarial networks for high-quality PET image estimation at low dose. *NeuroImage*. 2018;174:550-562.
87. Serrano-Sosa M, Spuhler K, DeLorenzo C, Huang C. PET Image Denoising Using Structural MRI with a Novel Dilated Convolutional Neural Network. *Journal of Nuclear Medicine*. 2020;61(supplement 1):434-434.
88. Xu J, Gong E, Ouyang J, Pauly J, Zaharchuk G, Han S. Ultra-low-dose 18F-FDG brain PET/MR denoising using deep learning and multi-contrast information. Paper presented at: Medical Imaging 2020: Image Processing2020.
89. Gong E, Pauly JM, Wintermark M, Zaharchuk G. Deep learning enables reduced gadolinium dose for contrast - enhanced brain MRI. *Journal of Magnetic Resonance Imaging*. 2018.
90. Benou A, Veksler R, Friedman A, Raviv TR. Ensemble of expert deep neural networks for spatio-temporal denoising of contrast-enhanced MRI sequences. *Medical image analysis*. 2017;42:145-159.
91. Jiang D, Dou W, Vosters L, Xu X, Sun Y, Tan T. Denoising of 3D magnetic resonance images with multi-channel residual learning of convolutional neural network. *Japanese journal of radiology*. 2018;36(9):566-574.
92. Pierrick C. MRI denoising using Deep Learning and Non-local averaging. *arXiv preprint arXiv:191104798*. 2019.
93. Gong E, Guo J, Liu J, Fan A, Pauly J, Zaharchuk G. Deep learning and multi-contrast based denoising for low-SNR Arterial Spin Labeling (ASL) MRI. Paper presented at: Medical Imaging 2020: Image Processing2020.
94. Kidoh M, Shinoda K, Kitajima M, et al. Deep learning based noise reduction for brain MR imaging: tests on phantoms and healthy volunteers. *Magnetic Resonance in Medical Sciences*. 2019:mp. 2019-0018.
95. Tian Q, Bilgic B, Fan Q, et al. DeepDTI: High-fidelity six-direction diffusion tensor imaging using deep learning. *NeuroImage*. 2020:117017.
96. van der Kouwe AJ, Benner T, Salat DH, Fischl B. Brain morphometry with multiecho MPRAGE. *NeuroImage*. 2008;40(2):559-569.
97. Hurley AC, Al - Radaideh A, Bai L, et al. Tailored RF pulse for magnetization inversion at ultrahigh field. *Magnetic Resonance in Medicine*. 2010;63(1):51-58.
98. Polak D, Setsompop K, Cauley SF, et al. Wave - CAIPI for highly accelerated MP - RAGE imaging. *Magnetic resonance in medicine*. 2018;79(1):401-406.



99. Van der Kouwe AJW, Tisdall MD, Bhat H, Fischl B, Polimeni JR. Multiple Echo and Inversion Time MPRAGE with Inner Loop GRAPPA Acceleration and Prospective Motion Correction for Minimally Distorted Multispectral Brain Morphometry. *In Proceedings of the 22nd Annual Meeting of the International Society for Magnetic Resonance in Medicine (ISMRM)*. 2014:0120.
100. Tisdall MD, Polimeni JR, Augustinack JC, van der Kouwe AJW. 350  $\mu\text{m}$  isotropic, high-contrast, low-blur, low-distortion MPRAGE morphometry acquisition at 3T. *In Proceedings of the 19th Annual Meeting of the Organization for Human Brain Mapping (OHBM)*. 2013:3371.
101. Reuter M, Rosas HD, Fischl B. Highly accurate inverse consistent registration: a robust approach. *NeuroImage*. 2010;53(4):1181-1196.
102. Uwano I, Kudo K, Yamashita F, et al. Intensity inhomogeneity correction for magnetic resonance imaging of human brain at 7T. *Medical Physics*. 2014;41(2).
103. Modat M, Ridgway GR, Taylor ZA, et al. Fast free-form deformation using graphics processing units. *Computer methods and programs in biomedicine*. 2010;98(3):278-284.
104. Modat M, Cash DM, Daga P, Winston GP, Duncan JS, Ourselin S. Global image registration using a symmetric block-matching approach. *Journal of Medical Imaging*. 2014;1(2):024003-024003.
105. Smith SM, Jenkinson M, Woolrich MW, et al. Advances in functional and structural MR image analysis and implementation as FSL. *NeuroImage*. 2004;23:S208-S219.
106. Jenkinson M, Beckmann CF, Behrens TEJ, Woolrich MW, Smith SM. FSL. *NeuroImage*. 2012;62(2):782-790.
107. Andersson JL, Sotiropoulos SN. An integrated approach to correction for off-resonance effects and subject movement in diffusion MR imaging. *NeuroImage*. 2016;125:1063-1078.
108. He K, Zhang X, Ren S, Sun J. Deep residual learning for image recognition. *In Proceedings of the IEEE conference on computer vision and pattern recognition*. 2016:770-778.
109. Kim J, Kwon Lee J, Mu Lee K. Accurate image super-resolution using very deep convolutional networks. *In Proceedings of the IEEE Conference on Computer Vision and Pattern Recognition*. 2016:1646-1654.
110. He K, Zhang X, Ren S, Sun J. Delving deep into rectifiers: Surpassing human-level performance on imagenet classification. *In Proceedings of the IEEE International Conference on Computer Vision*. 2015:1026-1034.
111. LeCun Y, Bottou L, Bengio Y, Haffner P. Gradient-based learning applied to document recognition. *Proceedings of the IEEE*. 1998;86(11):2278-2324.
112. Kingma DP, Ba J. Adam: A method for stochastic optimization. *Preprint at: <https://arxiv.org/abs/1412.6980>*. 2014.
113. Wang Z, Bovik AC, Sheikh HR, Simoncelli EP. Image quality assessment: from error visibility to structural similarity. *IEEE Transactions on Image Processing*. 2004;13(4):600-612.
114. Ségonne F, Pacheco J, Fischl B. Geometrically accurate topology-correction of cortical surfaces using nonseparating loops. *IEEE transactions on medical imaging*. 2007;26(4):518-529.
115. Reuter M, Schmansky NJ, Rosas HD, Fischl B. Within-subject template estimation for unbiased longitudinal image analysis. *NeuroImage*. 2012;61(4):1402-1418.
116. Reuter M, Fischl B. Avoiding asymmetry-induced bias in longitudinal image processing. *NeuroImage*. 2011;57(1):19-21.
117. Fujimoto K, Polimeni JR, Van Der Kouwe AJ, et al. Quantitative comparison of cortical surface reconstructions from MP2RAGE and multi-echo MPRAGE data at 3 and 7 T. *NeuroImage*. 2014;90:60-73.

118. Han X, Jovicich J, Salat D, et al. Reliability of MRI-derived measurements of human cerebral cortical thickness: the effects of field strength, scanner upgrade and manufacturer. *NeuroImage*. 2006;32(1):180-194.
119. Chang YV, Cauley SF, Liu W, et al. Quantitative assessment of automatic cortical surface reconstructions from Wave-CAIPI MPRAGE: A validation study. *In Proceedings of the 27th Annual Meeting of the International Society for Magnetic Resonance in Medicine*. 2018:2042.
120. Marek K, Jennings D, Lasch S, et al. The parkinson progression marker initiative (PPMI). *Progress in Neurobiology*. 2011;95(4):629-635.
121. Longo M, Conklin J, Cauley S, et al. Evaluation of Ultrafast Wave-CAIPI MPRAGE for Visual Grading and Automated Measurement of Brain Tissue Volume. *American Journal of Neuroradiology*. 2020.
122. Knoll F, Hammernik K, Kobler E, Pock T, Recht MP, Sodickson DK. Assessment of the generalization of learned image reconstruction and the potential for transfer learning. *Magnetic resonance in medicine*. 2019;81(1):116-128.
123. Hu Y, Xu Y, Tian Q, et al. RUN - UP: Accelerated multishot diffusion - weighted MRI reconstruction using an unrolled network with U - Net as priors. *Magnetic Resonance in Medicine*. 2020.
124. Simonyan K, Zisserman A. Very deep convolutional networks for large-scale image recognition. *Preprint at: <https://arxiv.org/abs/14091556>*. 2014.
125. Timofte R, Agustsson E, Van Gool L, et al. Ntire 2017 challenge on single image super-resolution: Methods and results. *In Proceedings of the IEEE Conference on Computer Vision and Pattern Recognition Workshops*. 2017:114-125.
126. Lüsebrink F, Sciarra A, Mattern H, Yakupov R, Speck O. T 1-weighted in vivo human whole brain MRI dataset with an ultrahigh isotropic resolution of 250  $\mu\text{m}$ . *Scientific data*. 2017;4:170032.
127. Tisdall MD, Polimeni JR, van der Kouwe AJW. Motion-corrected 350  $\mu\text{m}$  isotropic MPRAGE at 3 T using volumetric navigators (vNavs). *In Proceedings of the 21st Annual Meeting of the International Society for Magnetic Resonance in Medicine (ISMRM)*. 2013:0268.
128. Watanabe K, Kakeda S, Igata N, et al. Utility of real-time prospective motion correction (PROMO) on 3D T1-weighted imaging in automated brain structure measurements. *Scientific Reports*. 2016;6(1):38366.
129. Maclaren J, Herbst M, Speck O, Zaitsev M. Prospective motion correction in brain imaging: a review. *Magnetic resonance in medicine*. 2013;69(3):621-636.
130. Gallichan D, Marques JP, Gruetter R. Retrospective correction of involuntary microscopic head movement using highly accelerated fat image navigators (3D FatNavs) at 7T. *Magnetic resonance in medicine*. 2016;75(3):1030-1039.
131. Godenschweger F, Kägebein U, Stucht D, et al. Motion correction in MRI of the brain. *Physics in Medicine & Biology*. 2016;61(5):R32.

## Supplementary Information

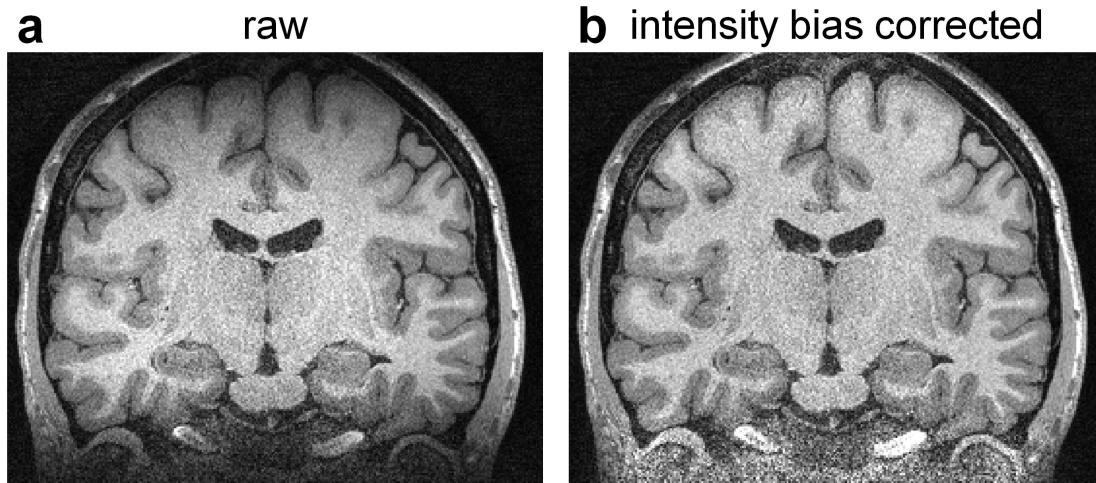

**Supplementary Figure 1. Intensity bias.** A representative coronal image slice from the raw data acquired using a slab-selective oblique-axial acquisition (a) and the same image slice corrected for the spatially varying intensity bias induced by the B<sub>1</sub> field inhomogeneity (b).

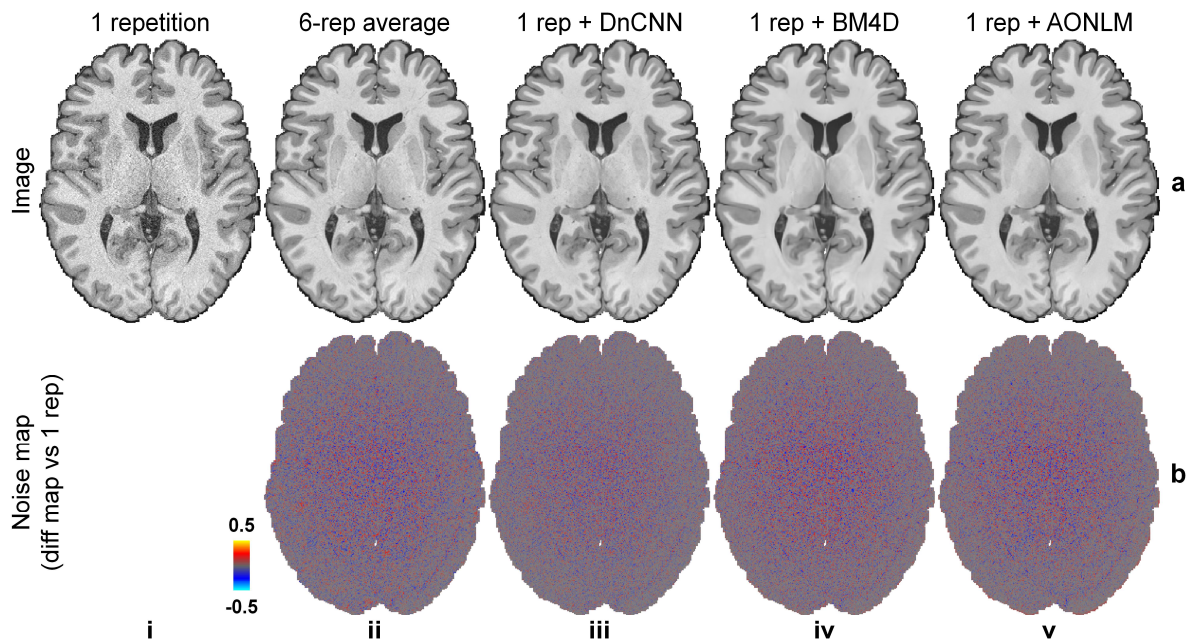

**Supplementary Figure 2. Noise estimation.** A representative axial image slice from the single-repetition data (a, i), the 6-repetition averaged data (a, ii), and the single-repetition data denoised by DnCNN (a, iii), BM4D (a, iv) and AONLM (a, v), and their residuals (i.e., estimated noise) compared to the image from the single-repetition data (rows a, i).

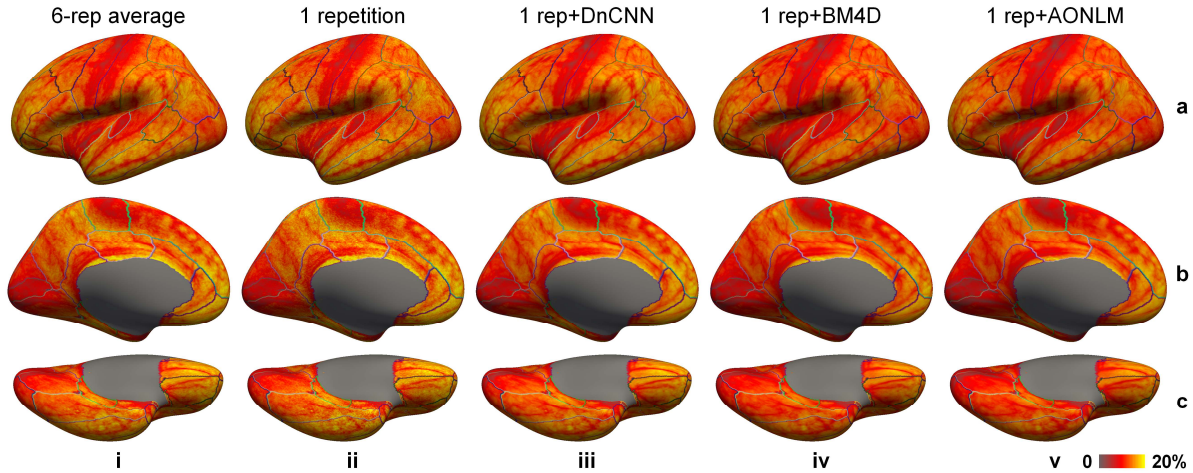

**Supplementary Figure 3. Averaged gray–white contrast.** Left-hemisphere vertex-wise contrast between the gray matter and white matter image intensity (expressed as  $[\text{white} - \text{gray}]/[\text{white} + \text{gray}] \cdot 100\%$ ) from the 6-repetition averaged data (column i), single-repetition data (column ii), single-repetition data denoised by DnCNN (column iii), BM4D (column iv) and AONLM (column v) averaged across 30 image volumes from the 5 evaluation subjects, displayed on inflated surface representations. Different cortical regions from the FreeSurfer cortical parcellation (i.e., *aparc.annot*) are depicted as colored outlines.



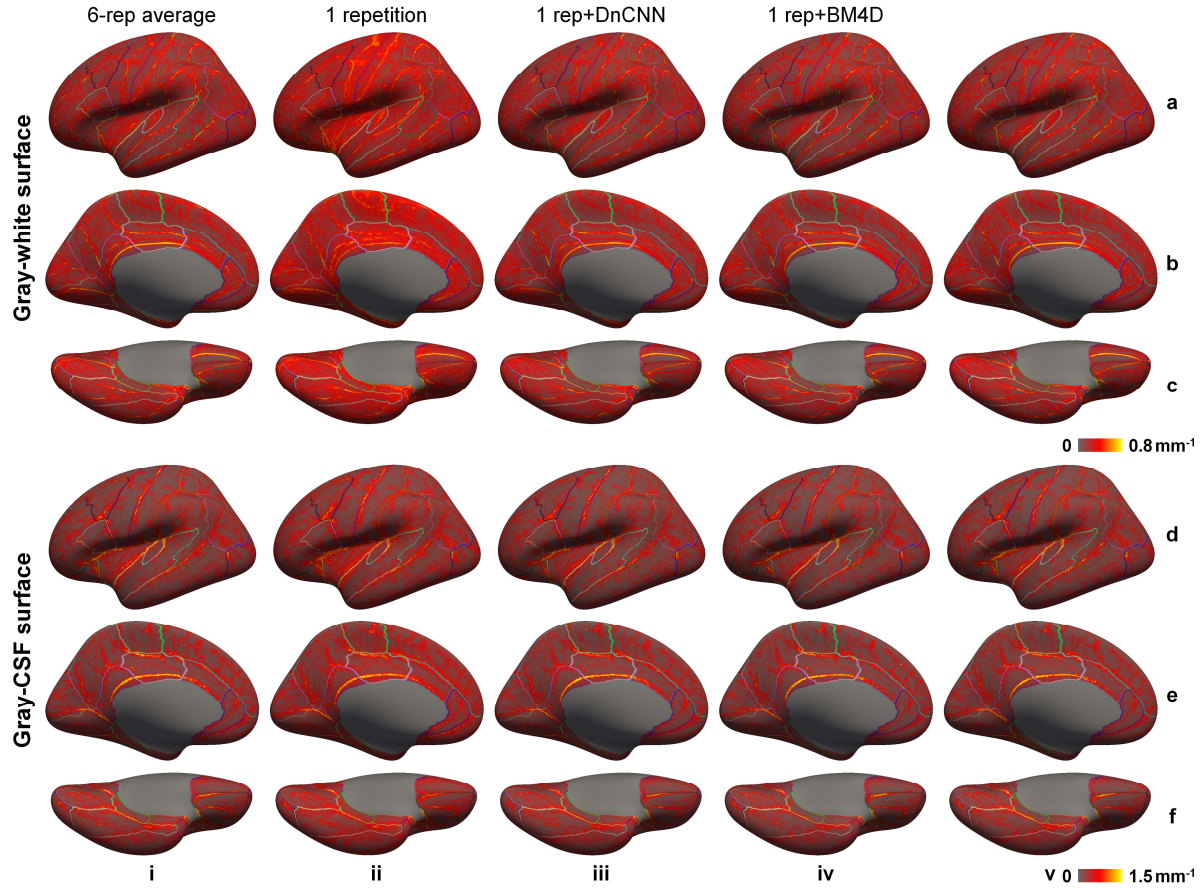

**Supplementary Figure 4. Averaged cortical surface smoothness.** Left-hemisphere vertex-wise mean curvature of the reconstructed gray–white surfaces (a–c) and gray–CSF surfaces (d–f) from the 6-repetition averaged data (column i), single-repetition data (column ii), single-repetition data denoised by DnCNN (column iii), BM4D (column iv) and AONLM (column v) averaged across 30 image volumes from the 5 evaluation subjects, displayed on inflated surface representations. Different cortical regions from the FreeSurfer cortical parcellation (i.e., *aparc.annot*) are depicted as colored outlines.

| Gray-white surface displacement (mm) compared to ground truth from 6-repetition averaged data |                            |                |                |                  |                  |                  |                 |                |                |
|-----------------------------------------------------------------------------------------------|----------------------------|----------------|----------------|------------------|------------------|------------------|-----------------|----------------|----------------|
| #                                                                                             | Cortices                   | 1 repetition   | 2 repetitions  | 3 repetitions    | 4 repetitions    | 5 repetitions    | 1 rep + DnCNN   | 1 rep + BM4D   | 1 rep + AONLM  |
| 1                                                                                             | Superior frontal           | 0.2724±0.0536  | 0.1692±0.03157 | 0.129±0.01805    | 0.1082±0.01406   | 0.09206±0.01484  | 0.1485±0.02164  | 0.168±0.02684  | 0.1669±0.02786 |
| 2                                                                                             | Rostral middle frontal     | 0.1977±0.07068 | 0.1252±0.03976 | 0.09743±0.02443  | 0.0831±0.02133   | 0.07218±0.02121  | 0.1172±0.02972  | 0.1311±0.03322 | 0.1271±0.03226 |
| 3                                                                                             | Caudal middle frontal      | 0.2647±0.06135 | 0.1636±0.03242 | 0.1211±0.01899   | 0.09885±0.01269  | 0.08617±0.01592  | 0.1397±0.01954  | 0.1533±0.02307 | 0.1531±0.02558 |
| 4                                                                                             | Pars opercularis           | 0.2544±0.07431 | 0.1517±0.03902 | 0.11±0.02165     | 0.09073±0.01774  | 0.077±0.01745    | 0.1235±0.02539  | 0.1353±0.02765 | 0.1352±0.02928 |
| 5                                                                                             | Pars triangularis          | 0.2372±0.1074  | 0.1502±0.06582 | 0.1069±0.03371   | 0.08975±0.02797  | 0.07695±0.02918  | 0.1206±0.03325  | 0.133±0.03641  | 0.1302±0.03755 |
| 6                                                                                             | Pars orbitalis             | 0.2248±0.08882 | 0.1518±0.05481 | 0.1165±0.0354    | 0.09857±0.03102  | 0.08235±0.02642  | 0.1425±0.04126  | 0.1535±0.04307 | 0.1489±0.04144 |
| 7                                                                                             | Lateral orbitofrontal      | 0.2732±0.06782 | 0.1841±0.04273 | 0.1381±0.02464   | 0.1175±0.02447   | 0.09621±0.01819  | 0.1544±0.03255  | 0.1691±0.03208 | 0.1717±0.03445 |
| 8                                                                                             | Medial orbitofrontal       | 0.2302±0.0599  | 0.1605±0.03942 | 0.13±0.0301      | 0.1101±0.02623   | 0.09281±0.02129  | 0.1492±0.03357  | 0.157±0.03212  | 0.1587±0.03261 |
| 9                                                                                             | Precentral                 | 0.234±0.05801  | 0.2106±0.0352  | 0.1655±0.02341   | 0.1374±0.01881   | 0.1204±0.0205    | 0.1835±0.03179  | 0.2068±0.04857 | 0.2135±0.0479  |
| 10                                                                                            | Paracentral                | 0.3474±0.05652 | 0.2146±0.03067 | 0.1687±0.02053   | 0.1419±0.01826   | 0.1231±0.02151   | 0.1905±0.02711  | 0.2162±0.05089 | 0.2287±0.05571 |
| 11                                                                                            | Frontal pole               | 0.2304±0.0875  | 0.1612±0.05737 | 0.1396±0.04845   | 0.1154±0.03685   | 0.107±0.04082    | 0.1659±0.06649  | 0.194±0.07748  | 0.1794±0.07227 |
| 12                                                                                            | Superior parietal          | 0.2165±0.04414 | 0.1303±0.01554 | 0.1018±0.009543  | 0.08448±0.006521 | 0.07332±0.009185 | 0.1235±0.01562  | 0.1387±0.02022 | 0.1396±0.01839 |
| 13                                                                                            | Inferior parietal          | 0.183±0.03884  | 0.1148±0.01074 | 0.09062±0.006357 | 0.07635±0.005439 | 0.06773±0.008305 | 0.1125±0.01452  | 0.1255±0.0205  | 0.1232±0.0188  |
| 14                                                                                            | Supramarginal              | 0.1982±0.0372  | 0.1247±0.02024 | 0.09831±0.01181  | 0.08271±0.01015  | 0.07243±0.01124  | 0.1194±0.01627  | 0.1315±0.02106 | 0.1294±0.02088 |
| 15                                                                                            | Postcentral                | 0.2642±0.04854 | 0.1696±0.03413 | 0.1317±0.0239    | 0.1108±0.02018   | 0.09446±0.01912  | 0.1592±0.02723  | 0.1811±0.03708 | 0.1821±0.03282 |
| 16                                                                                            | Precuneus                  | 0.2193±0.04294 | 0.1307±0.01409 | 0.1022±0.008607  | 0.0828±0.005642  | 0.07241±0.008587 | 0.1215±0.01296  | 0.1371±0.01762 | 0.1411±0.01781 |
| 17                                                                                            | Superior temporal          | 0.2593±0.03898 | 0.1726±0.02397 | 0.1315±0.01443   | 0.1144±0.01525   | 0.09869±0.01894  | 0.1555±0.01925  | 0.1662±0.0186  | 0.1665±0.01921 |
| 18                                                                                            | Middle temporal            | 0.2215±0.03958 | 0.144±0.02022  | 0.111±0.01282    | 0.09557±0.01214  | 0.08252±0.0128   | 0.1375±0.0191   | 0.1496±0.02422 | 0.1473±0.02215 |
| 19                                                                                            | Inferior temporal          | 0.2412±0.04746 | 0.1554±0.02683 | 0.122±0.01598    | 0.1045±0.01665   | 0.08684±0.01378  | 0.1526±0.02744  | 0.1618±0.02542 | 0.1643±0.02768 |
| 20                                                                                            | Banks of sup temp sulcus   | 0.1894±0.03193 | 0.1153±0.0147  | 0.08612±0.005842 | 0.07122±0.005444 | 0.05917±0.006335 | 0.09891±0.01159 | 0.1115±0.01577 | 0.1099±0.01658 |
| 21                                                                                            | Fusiform                   | 0.2463±0.05098 | 0.1546±0.03042 | 0.1196±0.01901   | 0.09856±0.014    | 0.08318±0.01684  | 0.1451±0.02223  | 0.1566±0.0217  | 0.1619±0.02429 |
| 22                                                                                            | Transverse temporal        | 0.3646±0.07071 | 0.2309±0.05088 | 0.1799±0.03548   | 0.1396±0.03033   | 0.1224±0.02988   | 0.204±0.0425    | 0.2192±0.05211 | 0.2423±0.04297 |
| 23                                                                                            | Entorhinal                 | 0.3434±0.06467 | 0.2577±0.08661 | 0.2046±0.04682   | 0.1725±0.03008   | 0.1477±0.02886   | 0.2442±0.04564  | 0.2839±0.05642 | 0.2853±0.06142 |
| 24                                                                                            | Temporal pole              | 0.3374±0.06953 | 0.252±0.06244  | 0.2046±0.0486    | 0.1732±0.03477   | 0.143±0.02987    | 0.2444±0.05361  | 0.3052±0.07984 | 0.3003±0.07335 |
| 25                                                                                            | Parahippocampal            | 0.2913±0.05749 | 0.192±0.03799  | 0.1455±0.01961   | 0.1266±0.01905   | 0.1086±0.01845   | 0.167±0.02443   | 0.1936±0.02066 | 0.1936±0.02091 |
| 26                                                                                            | Insula                     | 0.3808±0.05685 | 0.2648±0.03606 | 0.2082±0.02442   | 0.1774±0.0183    | 0.1555±0.02039   | 0.2568±0.02525  | 0.3028±0.03278 | 0.3158±0.03693 |
| 27                                                                                            | Lateral occipital          | 0.1969±0.03237 | 0.1251±0.01119 | 0.1016±0.008153  | 0.08696±0.008086 | 0.07763±0.007071 | 0.1489±0.0266   | 0.1594±0.02523 | 0.1505±0.02395 |
| 28                                                                                            | Lingual                    | 0.2352±0.03415 | 0.1624±0.01964 | 0.1348±0.01657   | 0.1168±0.01676   | 0.103±0.01289    | 0.2157±0.03783  | 0.2265±0.04672 | 0.2282±0.0414  |
| 29                                                                                            | Cuneus                     | 0.2169±0.04204 | 0.1433±0.01586 | 0.122±0.01576    | 0.1037±0.0135    | 0.09455±0.01412  | 0.1791±0.03972  | 0.189±0.03014  | 0.1797±0.02911 |
| 30                                                                                            | Pericalcarine              | 0.2432±0.03715 | 0.1708±0.02007 | 0.1444±0.02321   | 0.1285±0.02209   | 0.1181±0.02442   | 0.2444±0.05763  | 0.2452±0.0581  | 0.2351±0.04442 |
| 31                                                                                            | Rostral anterior cingulate | 0.3113±0.07176 | 0.1987±0.04196 | 0.1517±0.03522   | 0.1219±0.02441   | 0.1028±0.01943   | 0.1596±0.03249  | 0.1675±0.03063 | 0.1692±0.02938 |
| 32                                                                                            | Caudal anterior cingulate  | 0.2847±0.05613 | 0.1869±0.0353  | 0.1376±0.01828   | 0.1121±0.01195   | 0.09756±0.01809  | 0.1487±0.02033  | 0.1574±0.02267 | 0.1572±0.02259 |
| 33                                                                                            | Posterior cingulate        | 0.3±0.04635    | 0.1798±0.03109 | 0.1306±0.01324   | 0.1064±0.01108   | 0.09014±0.01407  | 0.1452±0.02111  | 0.1552±0.0195  | 0.1604±0.01883 |
| 34                                                                                            | Isthmus cingulate          | 0.3189±0.07067 | 0.2002±0.03621 | 0.1539±0.02359   | 0.127±0.01811    | 0.1099±0.02011   | 0.1734±0.02555  | 0.1886±0.0248  | 0.1925±0.02475 |
| 35                                                                                            | Whole brain                | 0.2471±0.04139 | 0.1578±0.02556 | 0.1229±0.01523   | 0.1033±0.01237   | 0.08925±0.01333  | 0.1493±0.02013  | 0.1647±0.02477 | 0.165±0.02452  |

**Supplementary Table 1. Gray–white surface displacement.** The group mean and standard deviation of the mean absolute displacement of the gray–white surface estimated from the images from the single-repetition data, 2- to 5-repetition averaged data and the single-repetition data denoised by DnCNN, BM4D and AONLM compared to the images from the 6-repetition averaged data across 30 image volumes from the 5 evaluation subjects, calculated for 34 cortical parcels (left and right hemispheres combined) from the Desikan-Killiany Atlas provided by FreeSurfer and for the whole brain.

| Gray-CSF surface displacement (mm) compared to ground truth from 6-repetition averaged data |                            |                |                  |                  |                  |                  |                 |                 |                |
|---------------------------------------------------------------------------------------------|----------------------------|----------------|------------------|------------------|------------------|------------------|-----------------|-----------------|----------------|
| #                                                                                           | Cortices                   | 1 repetition   | 2 repetitions    | 3 repetitions    | 4 repetitions    | 5 repetitions    | 1 rep + DnCNN   | 1 rep + BM4D    | 1 rep + AONLM  |
| 1                                                                                           | Superior frontal           | 0.1913±0.04444 | 0.1207±0.02437   | 0.09649±0.01568  | 0.08558±0.01537  | 0.07352±0.01393  | 0.1232±0.02731  | 0.1534±0.04332  | 0.1388±0.03301 |
| 2                                                                                           | Rostral middle frontal     | 0.1946±0.05661 | 0.1198±0.03456   | 0.09838±0.02835  | 0.08698±0.02634  | 0.07622±0.02587  | 0.1366±0.04473  | 0.1823±0.07096  | 0.1579±0.05555 |
| 3                                                                                           | Caudal middle frontal      | 0.1603±0.0349  | 0.09986±0.0206   | 0.07789±0.01208  | 0.06847±0.01274  | 0.06001±0.01312  | 0.1036±0.0233   | 0.1189±0.03143  | 0.1102±0.02552 |
| 4                                                                                           | Pars opercularis           | 0.1654±0.03633 | 0.1043±0.01871   | 0.08358±0.01365  | 0.07083±0.0108   | 0.05961±0.01147  | 0.1116±0.02648  | 0.1262±0.02771  | 0.1194±0.02401 |
| 5                                                                                           | Pars triangularis          | 0.1698±0.05536 | 0.1046±0.02718   | 0.08333±0.02012  | 0.07253±0.01886  | 0.06245±0.02091  | 0.1116±0.03349  | 0.145±0.05354   | 0.1283±0.03999 |
| 6                                                                                           | Pars orbitalis             | 0.1882±0.06619 | 0.1172±0.04062   | 0.09308±0.0301   | 0.08197±0.02991  | 0.07138±0.02999  | 0.1346±0.04962  | 0.1732±0.06938  | 0.1527±0.05666 |
| 7                                                                                           | Lateral orbitofrontal      | 0.2512±0.04223 | 0.1719±0.03047   | 0.1382±0.02319   | 0.1216±0.01951   | 0.09782±0.01619  | 0.1873±0.04114  | 0.2231±0.0538   | 0.2089±0.04156 |
| 8                                                                                           | Medial orbitofrontal       | 0.2684±0.05152 | 0.1853±0.02753   | 0.158±0.03127    | 0.1378±0.02747   | 0.1139±0.02364   | 0.2077±0.04553  | 0.236±0.06363   | 0.2208±0.04691 |
| 9                                                                                           | Precentral                 | 0.1532±0.02725 | 0.0992±0.01726   | 0.08069±0.01505  | 0.06877±0.01283  | 0.05789±0.009577 | 0.0967±0.01662  | 0.1067±0.02339  | 0.1011±0.01729 |
| 10                                                                                          | Paracentral                | 0.1569±0.0348  | 0.09981±0.02037  | 0.07765±0.01613  | 0.06533±0.01382  | 0.0554±0.01059   | 0.1021±0.01956  | 0.1117±0.02158  | 0.1086±0.02198 |
| 11                                                                                          | Frontal pole               | 0.2384±0.07801 | 0.1562±0.04237   | 0.1487±0.05193   | 0.1229±0.04512   | 0.1192±0.0386    | 0.1739±0.05222  | 0.241±0.08651   | 0.2052±0.06352 |
| 12                                                                                          | Superior parietal          | 0.1539±0.03881 | 0.09713±0.01508  | 0.07764±0.01368  | 0.06789±0.01127  | 0.05969±0.0107   | 0.09971±0.02567 | 0.1141±0.03445  | 0.1054±0.03025 |
| 13                                                                                          | Inferior parietal          | 0.1563±0.03094 | 0.09765±0.01115  | 0.07842±0.008508 | 0.06813±0.008158 | 0.06141±0.01181  | 0.1092±0.02103  | 0.1266±0.03087  | 0.1167±0.02781 |
| 14                                                                                          | Supramarginal              | 0.1674±0.04344 | 0.1096±0.02416   | 0.0874±0.01404   | 0.07738±0.01405  | 0.06672±0.01428  | 0.1149±0.02314  | 0.1317±0.03241  | 0.1213±0.0244  |
| 15                                                                                          | Postcentral                | 0.1295±0.02017 | 0.08505±0.01062  | 0.06702±0.008854 | 0.05779±0.006189 | 0.04923±0.006239 | 0.0866±0.01395  | 0.09757±0.01998 | 0.0916±0.01596 |
| 16                                                                                          | Precuneus                  | 0.1673±0.0326  | 0.1061±0.01546   | 0.08349±0.01133  | 0.07014±0.008038 | 0.06049±0.008582 | 0.1117±0.02195  | 0.1274±0.02823  | 0.121±0.02483  |
| 17                                                                                          | Superior temporal          | 0.2206±0.04574 | 0.1575±0.03521   | 0.124±0.02138    | 0.1113±0.02306   | 0.09833±0.02499  | 0.154±0.02904   | 0.1686±0.03683  | 0.1603±0.03431 |
| 18                                                                                          | Middle temporal            | 0.2326±0.05577 | 0.1587±0.04203   | 0.123±0.02847    | 0.1076±0.02311   | 0.09471±0.03011  | 0.1631±0.0419   | 0.1797±0.04698  | 0.1687±0.04635 |
| 19                                                                                          | Inferior temporal          | 0.2876±0.06326 | 0.1966±0.05414   | 0.1547±0.02971   | 0.1363±0.03134   | 0.1107±0.02741   | 0.2037±0.05935  | 0.2129±0.04838  | 0.2025±0.04408 |
| 20                                                                                          | Banks of sup temp sulcus   | 0.1831±0.03068 | 0.125±0.04315    | 0.09274±0.00744  | 0.0782±0.006199  | 0.0654±0.007666  | 0.1273±0.01958  | 0.1462±0.02918  | 0.1357±0.02035 |
| 21                                                                                          | Fusiform                   | 0.2506±0.0492  | 0.1701±0.0397    | 0.1339±0.02693   | 0.114±0.02388    | 0.09615±0.02407  | 0.1708±0.03484  | 0.1823±0.03444  | 0.1799±0.03402 |
| 22                                                                                          | Transverse temporal        | 0.2191±0.05948 | 0.1489±0.04053   | 0.1261±0.03432   | 0.1043±0.03193   | 0.0918±0.02803   | 0.1584±0.04886  | 0.156±0.03833   | 0.1571±0.0416  |
| 23                                                                                          | Entorhinal                 | 0.4437±0.105   | 0.3581±0.2666    | 0.2517±0.06709   | 0.2154±0.03797   | 0.1911±0.06227   | 0.2847±0.0437   | 0.2902±0.05204  | 0.2949±0.05644 |
| 24                                                                                          | Temporal pole              | 0.4115±0.12    | 0.3316±0.1551    | 0.249±0.06562    | 0.218±0.0629     | 0.1839±0.06022   | 0.2745±0.0688   | 0.2658±0.04893  | 0.2574±0.04887 |
| 25                                                                                          | Parahippocampal            | 0.272±0.06648  | 0.1813±0.04378   | 0.1419±0.0317    | 0.1236±0.03232   | 0.1011±0.02358   | 0.1844±0.0388   | 0.1968±0.04689  | 0.1984±0.03872 |
| 26                                                                                          | Insula                     | 0.2739±0.03667 | 0.1973±0.01806   | 0.1655±0.01239   | 0.1438±0.00929   | 0.1282±0.01066   | 0.1957±0.01948  | 0.2071±0.0182   | 0.2103±0.01481 |
| 27                                                                                          | Lateral occipital          | 0.1537±0.02931 | 0.09403±0.007145 | 0.07442±0.005717 | 0.06486±0.005007 | 0.05775±0.006145 | 0.1083±0.02076  | 0.1158±0.02207  | 0.1107±0.02149 |
| 28                                                                                          | Lingual                    | 0.2011±0.0361  | 0.1272±0.01691   | 0.1059±0.01661   | 0.09029±0.01223  | 0.0802±0.01274   | 0.1535±0.02342  | 0.1539±0.02951  | 0.157±0.0286   |
| 29                                                                                          | Cuneus                     | 0.1422±0.02873 | 0.08665±0.009383 | 0.07162±0.01121  | 0.06233±0.007152 | 0.05506±0.008055 | 0.09928±0.01603 | 0.1052±0.01768  | 0.1026±0.01884 |
| 30                                                                                          | Pericalcarine              | 0.1571±0.03294 | 0.1017±0.0154    | 0.08431±0.01782  | 0.07493±0.01652  | 0.06826±0.02038  | 0.1142±0.02938  | 0.1173±0.0313   | 0.1173±0.02879 |
| 31                                                                                          | Rostral anterior cingulate | 0.2588±0.04309 | 0.1835±0.03033   | 0.1482±0.02499   | 0.1292±0.02689   | 0.1072±0.02067   | 0.1833±0.03949  | 0.2113±0.04781  | 0.1896±0.03269 |
| 32                                                                                          | Caudal anterior cingulate  | 0.2473±0.04066 | 0.1752±0.01942   | 0.1427±0.01366   | 0.123±0.01032    | 0.1019±0.01064   | 0.1714±0.02416  | 0.1834±0.02819  | 0.1744±0.0237  |
| 33                                                                                          | Posterior cingulate        | 0.2285±0.03216 | 0.1566±0.01709   | 0.125±0.01029    | 0.1058±0.007343  | 0.08979±0.009166 | 0.156±0.01967   | 0.1707±0.02255  | 0.1653±0.0211  |
| 34                                                                                          | Isthmus cingulate          | 0.2518±0.03012 | 0.1746±0.0155    | 0.143±0.008907   | 0.1211±0.006963  | 0.1019±0.007722  | 0.1706±0.02017  | 0.1795±0.01711  | 0.1768±0.01901 |
| 35                                                                                          | Whole brain                | 0.1935±0.03284 | 0.1275±0.01984   | 0.1021±0.01357   | 0.08884±0.01161  | 0.07636±0.01214  | 0.1337±0.02316  | 0.1517±0.03209  | 0.1423±0.02613 |

**Supplementary Table 2. Gray–CSF surface displacement.** The group mean and standard deviation of the mean absolute displacement of the gray–CSF surface estimated from the images from the single-repetition data, 2- to 5-repetition averaged data and the single-repetition data denoised by DnCNN, BM4D and AONLM compared to the images from the 6-repetition averaged data across 30 image volumes from the 5 evaluation subjects, calculated for 34 cortical parcels (left and right hemispheres combined) from the Desikan-Killiany Atlas provided by FreeSurfer and for the whole brain.



| Cortical thickness difference (mm) compared to ground truth from 6-repetition averaged data |                            |                |                  |                  |                  |                  |                |                |                |
|---------------------------------------------------------------------------------------------|----------------------------|----------------|------------------|------------------|------------------|------------------|----------------|----------------|----------------|
| #                                                                                           | Cortices                   | 1 repetition   | 2 repetitions    | 3 repetitions    | 4 repetitions    | 5 repetitions    | 1 rep + DnCNN  | 1 rep + BM4D   | 1 rep + AONLM  |
| 1                                                                                           | Superior frontal           | 0.1853±0.03055 | 0.1186±0.02105   | 0.09382±0.01344  | 0.08042±0.01117  | 0.06817±0.01079  | 0.1214±0.02253 | 0.1499±0.03158 | 0.1373±0.02657 |
| 2                                                                                           | Rostral middle frontal     | 0.1631±0.04248 | 0.1009±0.02796   | 0.08117±0.02128  | 0.06981±0.01771  | 0.05943±0.01533  | 0.1121±0.03357 | 0.1384±0.04659 | 0.1253±0.03917 |
| 3                                                                                           | Caudal middle frontal      | 0.1748±0.03459 | 0.1116±0.02328   | 0.08574±0.01335  | 0.07274±0.01203  | 0.06092±0.01087  | 0.1112±0.02092 | 0.1303±0.02641 | 0.1239±0.02395 |
| 4                                                                                           | Pars opercularis           | 0.1714±0.0379  | 0.1063±0.02142   | 0.08087±0.01459  | 0.06865±0.0119   | 0.05729±0.009922 | 0.107±0.02624  | 0.1203±0.02687 | 0.116±0.02429  |
| 5                                                                                           | Pars triangularis          | 0.172±0.06022  | 0.1079±0.0393    | 0.08104±0.02311  | 0.06843±0.01959  | 0.05813±0.01807  | 0.1077±0.03285 | 0.1289±0.04786 | 0.1196±0.03938 |
| 6                                                                                           | Pars orbitalis             | 0.1683±0.04852 | 0.1111±0.03545   | 0.0875±0.0284    | 0.07326±0.02176  | 0.06187±0.01856  | 0.1207±0.03792 | 0.1425±0.05234 | 0.1306±0.0429  |
| 7                                                                                           | Lateral orbitofrontal      | 0.203±0.03651  | 0.141±0.02708    | 0.112±0.01909    | 0.09671±0.01592  | 0.0787±0.01252   | 0.1514±0.03095 | 0.1775±0.04205 | 0.1705±0.03593 |
| 8                                                                                           | Medial orbitofrontal       | 0.2003±0.03826 | 0.1416±0.02494   | 0.121±0.02194    | 0.1031±0.0182    | 0.08639±0.01666  | 0.1628±0.03482 | 0.18±0.04679   | 0.1752±0.03646 |
| 9                                                                                           | Precentral                 | 0.1922±0.03063 | 0.1264±0.01884   | 0.1014±0.01442   | 0.08396±0.011    | 0.07186±0.01153  | 0.1325±0.02406 | 0.1493±0.03568 | 0.1528±0.03431 |
| 10                                                                                          | Paracentral                | 0.1986±0.0269  | 0.1295±0.01957   | 0.1025±0.01324   | 0.08482±0.01074  | 0.07088±0.01206  | 0.1395±0.02098 | 0.1539±0.03789 | 0.1625±0.03939 |
| 11                                                                                          | Frontal pole               | 0.1861±0.05158 | 0.1253±0.03208   | 0.1114±0.03126   | 0.09341±0.02309  | 0.08576±0.01941  | 0.1496±0.04203 | 0.1839±0.06527 | 0.1615±0.04754 |
| 12                                                                                          | Superior parietal          | 0.1491±0.02225 | 0.09529±0.01024  | 0.07489±0.006546 | 0.06361±0.004999 | 0.05417±0.005375 | 0.1041±0.02195 | 0.1183±0.02581 | 0.1142±0.02263 |
| 13                                                                                          | Inferior parietal          | 0.1397±0.02422 | 0.08831±0.009968 | 0.07041±0.005213 | 0.06014±0.005024 | 0.05274±0.005975 | 0.0965±0.01778 | 0.1119±0.02005 | 0.1066±0.02054 |
| 14                                                                                          | Supramarginal              | 0.1485±0.03003 | 0.09654±0.01706  | 0.07699±0.01058  | 0.0663±0.008693  | 0.05666±0.008479 | 0.1019±0.01817 | 0.1159±0.0227  | 0.1096±0.01876 |
| 15                                                                                          | Postcentral                | 0.1665±0.02588 | 0.1092±0.01778   | 0.08545±0.01273  | 0.07156±0.01021  | 0.05974±0.009252 | 0.1175±0.02093 | 0.1335±0.02838 | 0.1337±0.02467 |
| 16                                                                                          | Precuneus                  | 0.1488±0.02005 | 0.09779±0.01061  | 0.07796±0.007576 | 0.06417±0.005039 | 0.05462±0.005488 | 0.1044±0.01512 | 0.1199±0.01846 | 0.119±0.01758  |
| 17                                                                                          | Superior temporal          | 0.1912±0.02614 | 0.133±0.02027    | 0.1047±0.01179   | 0.09284±0.01161  | 0.07931±0.01318  | 0.1332±0.01916 | 0.1487±0.02502 | 0.1425±0.02208 |
| 18                                                                                          | Middle temporal            | 0.1845±0.03134 | 0.1273±0.02497   | 0.1014±0.01732   | 0.08789±0.01388  | 0.07544±0.01631  | 0.1346±0.02815 | 0.1538±0.03099 | 0.1462±0.02955 |
| 19                                                                                          | Inferior temporal          | 0.2074±0.04201 | 0.1461±0.03331   | 0.1166±0.01991   | 0.1016±0.02024   | 0.08295±0.01691  | 0.1599±0.04164 | 0.1738±0.03635 | 0.1646±0.03358 |
| 20                                                                                          | Banks of sup temp sulcus   | 0.155±0.02527  | 0.1023±0.0263    | 0.0763±0.00614   | 0.06423±0.004637 | 0.0536±0.005343  | 0.1055±0.01555 | 0.1218±0.02029 | 0.1139±0.01642 |
| 21                                                                                          | Fusiform                   | 0.1926±0.03602 | 0.136±0.02807    | 0.1069±0.01987   | 0.09074±0.01791  | 0.07546±0.01684  | 0.1387±0.02418 | 0.1572±0.0279  | 0.155±0.02842  |
| 22                                                                                          | Transverse temporal        | 0.2331±0.0421  | 0.1492±0.03417   | 0.1154±0.02583   | 0.0932±0.02032   | 0.08142±0.01675  | 0.1483±0.02395 | 0.154±0.02554  | 0.1657±0.02443 |
| 23                                                                                          | Entorhinal                 | 0.3209±0.07421 | 0.2632±0.1661    | 0.1881±0.05271   | 0.1585±0.02637   | 0.1416±0.03688   | 0.2265±0.04005 | 0.2367±0.05287 | 0.2367±0.05558 |
| 24                                                                                          | Temporal pole              | 0.2957±0.08222 | 0.2418±0.1101    | 0.1869±0.04348   | 0.1599±0.03715   | 0.1379±0.03905   | 0.2201±0.05038 | 0.2372±0.05409 | 0.2288±0.05605 |
| 25                                                                                          | Parahippocampal            | 0.2255±0.03986 | 0.1611±0.03048   | 0.1259±0.02137   | 0.1108±0.02247   | 0.09077±0.0186   | 0.1687±0.03112 | 0.1859±0.03972 | 0.1829±0.03407 |
| 26                                                                                          | Insula                     | 0.242±0.0318   | 0.1763±0.01763   | 0.1456±0.01314   | 0.126±0.01032    | 0.1136±0.01147   | 0.182±0.01983  | 0.2041±0.02418 | 0.2057±0.02263 |
| 27                                                                                          | Lateral occipital          | 0.1447±0.02396 | 0.09005±0.006984 | 0.07283±0.003932 | 0.06242±0.003198 | 0.05505±0.00378  | 0.1089±0.01737 | 0.1212±0.01866 | 0.1153±0.01893 |
| 28                                                                                          | Lingual                    | 0.1703±0.02699 | 0.1165±0.01274   | 0.09657±0.01102  | 0.08212±0.008749 | 0.07114±0.007885 | 0.1557±0.02316 | 0.1648±0.03295 | 0.166±0.0262   |
| 29                                                                                          | Cuneus                     | 0.1442±0.02413 | 0.09269±0.00823  | 0.07796±0.00646  | 0.06602±0.005539 | 0.05728±0.005062 | 0.118±0.02291  | 0.1261±0.01881 | 0.1222±0.02001 |
| 30                                                                                          | Pericalcarine              | 0.1617±0.02855 | 0.1107±0.01377   | 0.09247±0.01198  | 0.08154±0.01136  | 0.07259±0.01324  | 0.1669±0.04166 | 0.1619±0.04207 | 0.1551±0.03643 |
| 31                                                                                          | Rostral anterior cingulate | 0.214±0.03345  | 0.1449±0.02209   | 0.1152±0.01989   | 0.09787±0.01866  | 0.08315±0.01403  | 0.146±0.03294  | 0.1647±0.03866 | 0.1539±0.03146 |
| 32                                                                                          | Caudal anterior cingulate  | 0.1982±0.02901 | 0.1408±0.01927   | 0.1143±0.01261   | 0.097±0.009672   | 0.08374±0.01348  | 0.1422±0.01745 | 0.1507±0.02224 | 0.1455±0.02152 |
| 33                                                                                          | Posterior cingulate        | 0.1947±0.02562 | 0.1313±0.01813   | 0.1034±0.01065   | 0.08557±0.007924 | 0.0729±0.008893  | 0.1345±0.0187  | 0.1433±0.02052 | 0.1449±0.02004 |
| 34                                                                                          | Isthmus cingulate          | 0.2176±0.03474 | 0.1465±0.01827   | 0.1189±0.01218   | 0.1007±0.009819  | 0.08355±0.01006  | 0.1493±0.01937 | 0.1559±0.01735 | 0.1571±0.02014 |
| 35                                                                                          | Whole brain                | 0.1761±0.02746 | 0.1171±0.01801   | 0.09334±0.01196  | 0.07959±0.009615 | 0.06773±0.00934  | 0.1261±0.02026 | 0.1434±0.02681 | 0.1383±0.02349 |

**Supplementary Table 3. Cortical thickness difference.** The group mean and standard deviation of the mean absolute difference of the cortical thickness estimated from the images from the single-repetition data, 2- to 5-repetition averaged data and the single-repetition data denoised by DnCNN, BM4D and AONLM compared to the images from the 6-repetition averaged data across 30 image volumes from the 5 evaluation subjects, calculated for 34 cortical parcels (left and right hemispheres combined) from the Desikan-Killiany Atlas provided by FreeSurfer and for the whole brain.

| #  | Cortices                   | Scan-rescan precision                |                |                |                                    |                |                |                                    |                |                |
|----|----------------------------|--------------------------------------|----------------|----------------|------------------------------------|----------------|----------------|------------------------------------|----------------|----------------|
|    |                            | Gray-white surface displacement (mm) |                |                | Gray-CSF surface displacement (mm) |                |                | Cortical thickness difference (mm) |                |                |
|    |                            | 1 rep + DnCNN                        | 1 rep + BM4D   | 1 rep + AONLM  | 1 rep + DnCNN                      | 1 rep + BM4D   | 1 rep + AONLM  | 1 rep + DnCNN                      | 1 rep + BM4D   | 1 rep + AONLM  |
| 1  | Superior frontal           | 0.157±0.04002                        | 0.159±0.04046  | 0.1659±0.04202 | 0.1518±0.04321                     | 0.1703±0.04732 | 0.1665±0.0444  | 0.1452±0.03596                     | 0.1608±0.03906 | 0.1595±0.03903 |
| 2  | Rostral middle frontal     | 0.1425±0.05495                       | 0.1592±0.05791 | 0.1621±0.05646 | 0.18±0.08167                       | 0.2153±0.08891 | 0.2081±0.08159 | 0.1394±0.05284                     | 0.1608±0.05442 | 0.1608±0.05269 |
| 3  | Caudal middle frontal      | 0.147±0.03577                        | 0.15±0.03873   | 0.1586±0.04249 | 0.1298±0.03596                     | 0.138±0.04208  | 0.1403±0.03943 | 0.133±0.03158                      | 0.1426±0.0358  | 0.1463±0.03562 |
| 4  | Pars opercularis           | 0.1382±0.03913                       | 0.1371±0.03691 | 0.1446±0.03969 | 0.1426±0.03819                     | 0.143±0.03684  | 0.1445±0.03545 | 0.1339±0.03394                     | 0.1376±0.03359 | 0.1405±0.03507 |
| 5  | Pars triangularis          | 0.1403±0.05566                       | 0.1504±0.06056 | 0.1524±0.05812 | 0.1505±0.05755                     | 0.1657±0.06702 | 0.1635±0.06425 | 0.1323±0.0489                      | 0.1451±0.05364 | 0.1473±0.05508 |
| 6  | Pars orbitalis             | 0.1749±0.07372                       | 0.1893±0.07797 | 0.1894±0.07512 | 0.188±0.09946                      | 0.2115±0.09887 | 0.2058±0.099   | 0.1546±0.0669                      | 0.1748±0.06852 | 0.175±0.0693   |
| 7  | Lateral orbitofrontal      | 0.1937±0.0651                        | 0.1964±0.0644  | 0.2015±0.06355 | 0.2553±0.09246                     | 0.2681±0.09147 | 0.2669±0.08636 | 0.1949±0.05837                     | 0.2052±0.05872 | 0.2077±0.05615 |
| 8  | Medial orbitofrontal       | 0.1877±0.05595                       | 0.1887±0.05701 | 0.1953±0.05423 | 0.2737±0.09121                     | 0.2817±0.09183 | 0.2814±0.08638 | 0.206±0.05959                      | 0.2134±0.06522 | 0.2158±0.05669 |
| 9  | Precentral                 | 0.2019±0.04555                       | 0.1941±0.04627 | 0.2064±0.04806 | 0.119±0.02472                      | 0.1164±0.0256  | 0.1203±0.02376 | 0.1599±0.03272                     | 0.1592±0.03615 | 0.1689±0.03603 |
| 10 | Paracentral                | 0.2125±0.03338                       | 0.1972±0.03643 | 0.2208±0.04084 | 0.1288±0.02507                     | 0.1211±0.02566 | 0.1269±0.02685 | 0.1713±0.02595                     | 0.1665±0.03158 | 0.1825±0.03496 |
| 11 | Frontal pole               | 0.2133±0.1181                        | 0.2412±0.1165  | 0.2415±0.1251  | 0.2369±0.1384                      | 0.2956±0.117   | 0.2827±0.1149  | 0.1784±0.07987                     | 0.214±0.08191  | 0.2148±0.07765 |
| 12 | Superior parietal          | 0.138±0.01979                        | 0.1364±0.02123 | 0.1449±0.02286 | 0.1192±0.03514                     | 0.1255±0.03961 | 0.1258±0.03965 | 0.1238±0.02437                     | 0.1296±0.02686 | 0.1337±0.02628 |
| 13 | Inferior parietal          | 0.1191±0.01762                       | 0.1263±0.02141 | 0.1311±0.02203 | 0.1277±0.0292                      | 0.1397±0.03787 | 0.1389±0.0334  | 0.114±0.01778                      | 0.1266±0.02381 | 0.1272±0.02193 |
| 14 | Supramarginal              | 0.1285±0.02556                       | 0.1316±0.02738 | 0.1374±0.02837 | 0.1387±0.0382                      | 0.147±0.04231  | 0.1424±0.03633 | 0.1223±0.02435                     | 0.1325±0.02711 | 0.131±0.02619  |
| 15 | Postcentral                | 0.178±0.0376                         | 0.1724±0.03859 | 0.1853±0.03925 | 0.1098±0.02188                     | 0.1094±0.02426 | 0.1118±0.02179 | 0.1435±0.0263                      | 0.1437±0.02952 | 0.1514±0.02882 |
| 16 | Precuneus                  | 0.1399±0.01962                       | 0.1377±0.0201  | 0.1452±0.02017 | 0.1392±0.02875                     | 0.137±0.03378  | 0.1379±0.03176 | 0.1321±0.01891                     | 0.1345±0.02144 | 0.1376±0.02212 |
| 17 | Superior temporal          | 0.1646±0.02638                       | 0.1581±0.02687 | 0.1671±0.03005 | 0.1856±0.04356                     | 0.183±0.04722  | 0.1851±0.04347 | 0.1588±0.02904                     | 0.1662±0.03557 | 0.1673±0.03314 |
| 18 | Middle temporal            | 0.148±0.02896                        | 0.1503±0.0298  | 0.1564±0.03065 | 0.1902±0.0642                      | 0.2059±0.07408 | 0.1996±0.072   | 0.1608±0.03892                     | 0.1791±0.04963 | 0.1742±0.04722 |
| 19 | Inferior temporal          | 0.1779±0.04484                       | 0.1708±0.0389  | 0.1786±0.04239 | 0.2528±0.08932                     | 0.2593±0.09676 | 0.253±0.0968   | 0.1951±0.05706                     | 0.2092±0.0642  | 0.2027±0.06386 |
| 20 | Banks of sup temp sulcus   | 0.1115±0.01632                       | 0.1165±0.0205  | 0.1211±0.01895 | 0.1571±0.02971                     | 0.1636±0.0388  | 0.1589±0.02817 | 0.1313±0.01807                     | 0.1418±0.0248  | 0.1381±0.01861 |
| 21 | Fusiform                   | 0.1705±0.03561                       | 0.1617±0.0289  | 0.1715±0.03161 | 0.2182±0.06523                     | 0.207±0.06214  | 0.2095±0.06291 | 0.1772±0.04459                     | 0.1801±0.04654 | 0.1799±0.04528 |
| 22 | Transverse temporal        | 0.2239±0.04902                       | 0.2251±0.06411 | 0.2557±0.0556  | 0.1767±0.04511                     | 0.1559±0.04721 | 0.1594±0.03628 | 0.1743±0.02977                     | 0.1789±0.03816 | 0.1966±0.03589 |
| 23 | Entorhinal                 | 0.3109±0.07561                       | 0.284±0.05143  | 0.2988±0.05291 | 0.3575±0.09264                     | 0.3187±0.1033  | 0.3445±0.1153  | 0.2805±0.07655                     | 0.2742±0.07404 | 0.2781±0.08825 |
| 24 | Temporal pole              | 0.3031±0.09927                       | 0.2907±0.1182  | 0.3064±0.1129  | 0.3292±0.1547                      | 0.3054±0.1297  | 0.3276±0.1617  | 0.2688±0.1027                      | 0.2647±0.1076  | 0.2886±0.1264  |
| 25 | Parahippocampal            | 0.1944±0.03907                       | 0.1615±0.02378 | 0.1791±0.02739 | 0.2344±0.0733                      | 0.2121±0.06963 | 0.2259±0.07579 | 0.2095±0.05711                     | 0.1997±0.05964 | 0.2081±0.06089 |
| 26 | Insula                     | 0.2779±0.05112                       | 0.2631±0.04618 | 0.261±0.04645  | 0.232±0.03522                      | 0.2065±0.02563 | 0.2061±0.02456 | 0.2103±0.03394                     | 0.2022±0.03098 | 0.1987±0.02966 |
| 27 | Lateral occipital          | 0.1511±0.02218                       | 0.1621±0.02349 | 0.1639±0.02562 | 0.1233±0.02559                     | 0.1264±0.02715 | 0.1288±0.02704 | 0.1248±0.01818                     | 0.1349±0.02073 | 0.136±0.02157  |
| 28 | Lingual                    | 0.2055±0.02287                       | 0.2136±0.02852 | 0.2243±0.03003 | 0.1664±0.02971                     | 0.1559±0.02905 | 0.1641±0.0291  | 0.1681±0.02101                     | 0.1742±0.02509 | 0.1803±0.02616 |
| 29 | Cuneus                     | 0.1719±0.02902                       | 0.1855±0.03175 | 0.1874±0.03012 | 0.1098±0.02337                     | 0.1108±0.02402 | 0.1148±0.02367 | 0.1286±0.01702                     | 0.1395±0.02138 | 0.1403±0.01902 |
| 30 | Pericalcarine              | 0.211±0.03117                        | 0.2216±0.03522 | 0.2279±0.03896 | 0.1248±0.03283                     | 0.1261±0.02955 | 0.1327±0.03491 | 0.1608±0.02608                     | 0.1642±0.03376 | 0.1671±0.03185 |
| 31 | Rostral anterior cingulate | 0.1819±0.05255                       | 0.1788±0.04467 | 0.1798±0.04353 | 0.2347±0.08022                     | 0.2372±0.06655 | 0.2279±0.0626  | 0.1797±0.05297                     | 0.1857±0.04439 | 0.1798±0.0465  |
| 32 | Caudal anterior cingulate  | 0.1698±0.03529                       | 0.1666±0.03504 | 0.172±0.03783  | 0.2103±0.03663                     | 0.1981±0.03693 | 0.2012±0.03323 | 0.1702±0.02681                     | 0.1711±0.03071 | 0.171±0.0303   |
| 33 | Posterior cingulate        | 0.172±0.02972                        | 0.161±0.02872  | 0.1705±0.03047 | 0.194±0.03335                      | 0.1801±0.03517 | 0.1854±0.03289 | 0.1661±0.0294                      | 0.1651±0.03293 | 0.1655±0.03138 |
| 34 | Isthmus cingulate          | 0.1944±0.03594                       | 0.1684±0.02745 | 0.1797±0.02981 | 0.1979±0.02761                     | 0.174±0.02661  | 0.1855±0.02794 | 0.173±0.02684                      | 0.1544±0.02564 | 0.1615±0.02692 |
| 35 | Whole brain                | 0.1649±0.03371                       | 0.1654±0.0336  | 0.1726±0.0348  | 0.1648±0.04283                     | 0.1701±0.0447  | 0.1702±0.04257 | 0.1519±0.03158                     | 0.16±0.03421   | 0.1619±0.0338  |

**Supplementary Table 4. Scan-rescan precision.** The group mean and standard deviation of the mean absolute displacement/difference of the gray–white surface, gray–CSF surface and cortical thickness estimated from two consecutively acquired 1-repetition data denoised by DnCNN, BM4D and AONLM across 25 image volumes from the 5 evaluation subjects, calculated for 34 cortical parcels (left and right hemispheres combined) from the Desikan-Killiany Atlas provided by FreeSurfer and for the whole brain.
